# Supplementary material
Source: publisher figshare collection journal article supplement (https://rs.figshare.com/ndownloader/files/13439807)
Supplement: Supplementary file 1 [file 13439807]

## Sheet: Cask
					expmod										599.12	1120.7	2096.4	3921.5	7335.6	13722	25668	48014	89816	168010	p
					0.1	0.004	x0	t0							0.25448	0.16395	0.23763	0.20301	0.13711	0.071677	0.032196	0.0077736	0.004494	-0.11232	f
					250	500	1000	2000	4000	8000	16000	0	0	0	p
					0.0039713	0.020925	0.13891	0.3498	0.27941	0.13629	0.070701	0	0	0	f
					expmod
					0.1	0.004	x0	t0
					599.1	1120.8	2096.7	3922.3	7337.7	13727	25680	48041	89873	168130	p
					0.2546	0.16391	0.23783	0.20291	0.13712	0.071628	0.03218	0.0077459	0.0044948	-0.11242	f
					0.0602322	0.0467108	0.047398	0.0415071	0.0262386	0.0150044	0.0059712	0.00176584	0.000828544	-0.0360259
					0.285673	0.0630958	0.173174	0.16238	0.13879	0.0907623	0.0498144	0.0255715	0.00542019	0.00531924	2.55323e-08
	mev/x			Normalized	0	0.214668	0.327553	0.23121	0.141268	0.0598005	0.0195285	0.00518117	-0.000408919	0.00119907
	7.34822	0		E	500	877.093	1538.58	2698.96	4734.49	8305.17	14568.8	25556.4	44830.7	78641.4	1.75419
	x0			N	0.285673	0.0630959	0.173174	0.16238	0.13879	0.0907623	0.0498144	0.0255715	0.00542019	0.00531924
	0.05			theta	0.00630571	0.00359466	0.00204919	0.00116817	0.000665934	0.000379626	0.000216411	0.000123369	7.03281e-05	4.00916e-05
					1	1	1	1	1	1	1	1	1	1
		27.8986		E	294.995	672.088	1333.58	2493.96	4529.48	8100.16	14363.8	25351.4	44625.7	78436.4		0
		0		N	0.168544	0.0630958	0.173174	0.16238	0.13879	0.0907623	0.0498144	0.0255715	0.00542019	0.00531924		27.8986
				Nnorm	0.190905	0.0714667	0.196148	0.183922	0.157203	0.102804	0.0564232	0.0289641	0.00613928	0.00602494		32.4322
				theta	0.252688	0.11091	0.0558959	0.0298889	0.016457	0.00920248	0.00518954	0.00294033	0.00167037	0.000950345		48.6428
					0.268918	0.803259	0.998341	1	1	1	1	1	1	1
		32.4322		E	261.681	638.774	1300.27	2460.64	4496.17	8066.85	14330.5	25318.1	44592.4	78403.1
				N	0.14951	0.0630958	0.173174	0.16238	0.13879	0.0907623	0.0498144	0.0255715	0.00542019	0.00531924
				Nnorm	0.173077	0.0730414	0.20047	0.187975	0.160666	0.105069	0.0576664	0.0296023	0.00627455	0.00615769
				theta	0.307093	0.125804	0.0618031	0.0326583	0.0178731	0.0099618	0.00560765	0.00317403	0.00180211	0.00102496
					0.191096	0.717391	0.994679	1	1	1	1	1	1	1
		48.6428		E	142.562	519.655	1181.15	2341.53	4377.05	7947.73	14211.4	25199	44473.3	78284
				N	0.0814522	0.0630958	0.173174	0.16238	0.13879	0.0907623	0.0498144	0.0255715	0.00542019	0.00531924			0.204221
				Nnorm	0.102355	0.0792882	0.217615	0.204054	0.174407	0.114055	0.0625983	0.032134	0.00681118	0.00668432
				theta	0.690157	0.189337	0.0833005	0.0420197	0.0224786	0.0123796	0.00692334	0.00390453	0.00221234	0.00125684			13.2811
					0.0411195	0.427591	0.943993	0.999988	1	1	1	1	1	1			1614.32
	T		0	27.8986	32.4322	48.6428		0	27.8986	32.4322	48.6428
	sum		1283650	614779	600144	580976		1.30613e+06	520151	503100	490385						81637.6	4.82198	2.44583	6.01325
	0.5	0.0005	845910	5542	4924	3923		472019	4724.54	4077.07	2875.05	463893	5584.05	4863.51	3406.17		172520	0.319003	0.743096	68.0894
	1.5	0.0015	200960	10673	9618	7955		231447	9584.78	8601.94	6664.68	227463	11328.5	10261.2	7895.87		3495.22	40.2559	43.013	0.439468
	2.5	0.0025	89316	12961	11740	9831		136040	10985.3	9919.05	7962.54	133698	12983.8	11832.4	9433.5		22053.8	0.0399432	0.726658	16.0721
	3.5	0.0035	47510	13655	12747	11052		90425.2	11928.5	10801.2	8642.93	88868.5	14098.6	12884.7	10239.6		36003.5	14.4106	1.48757	59.721
	4.5	0.0045	28403	14047	13055	11476		66837.7	12302.3	11254	9172.86	65687.1	14540.4	13424.8	10867.4		48942.2	17.3316	10.4746	32.2745
	5.5	0.0055	18380	14029	13126	11582		53322	12257.2	11315.1	9443.19	52404	14487.1	13497.7	11187.7		62983.4	14.9583	10.5281	13.4255
	6.5	0.0065	12225	13650	12849	11614		45431.7	12001.6	11150.8	9492.39	44649.6	14184.9	13301.7	11246		86000.2	20.9644	15.9487	11.6626
	7.5	0.0075	8616	13703	12842	11707		39919.3	11672.3	10885.9	9399.53	39232.1	13795.8	12985.7	11135.9		108791	0.628306	1.60786	27.855
	8.5	0.0085	6365	13186	12414	11418		34937.1	11329.6	10592.7	9228.47	34335.7	13390.7	12635.9	10933.3		122916	3.17746	3.96799	20.5765
	9.5	0.0095	4734	12755	12187	11089		29987.4	10983.4	10295.8	9024.54	29471.2	12981.5	12281.8	10691.7		129263	4.02204	0.737647	14.2355
	10.5	0.0105	3602	12113	11799	10851		25132	10631.4	9996.36	8812.53	24699.4	12565.5	11924.6	10440.5		123570	16.9045	1.33658	15.5285
	11.5	0.0115	2811	11985	11551	10518		20537	10276.7	9692.81	8600.69	20183.5	12146.3	11562.5	10189.5		107365	2.16951	0.0113969	10.2576
	12.5	0.0125	2189	11592	11009	10267		16345.8	9926.78	9388.23	8388.99	16064.4	11732.7	11199.2	9938.73		87951.7	1.70775	3.28437	10.4958
	13.5	0.0135	1709	11008	10648	9833		12659.1	9588.43	9088.37	8176.04	12441.2	11332.8	10841.4	9686.44		67395.8	9.58298	3.51442	2.18441
	14.5	0.0145	1401	10648	10449	9626		9532.76	9264.55	8798.05	7962.11	9368.65	10950	10495.1	9432.99		45313	8.56503	0.20365	3.87022
	15.5	0.0155	1164	10255	9941	9563		6977.3	8954.69	8519.49	7749.22	6857.19	10583.8	10162.8	9180.77		27845.7	10.5392	4.95009	15.278
	16.5	0.0165	1009	10026	9636	9315		4963.27	8656.77	8252.47	7540.03	4877.83	10231.6	9844.31	8932.93		14834.3	4.21756	4.50307	15.6712
	17.5	0.0175	844	9622	9416	8980		3431.63	8368.77	7995.52	7336.73	3372.55	9891.24	9537.79	8692.08		7575.34	7.534	1.57527	9.23149
	18.5	0.0185	760	9234	9208	8668		2306.59	8089.58	7746.99	7140.52	2266.89	9561.26	9241.32	8459.62		2987.77	11.5984	0.120592	5.00949
	19.5	0.0195	639	9080	8991	8436		1507.6	7819.09	7505.76	6951.58	1481.64	9241.57	8953.57	8235.77		1111.19	2.87483	0.155846	4.75237
	20.5	0.0205	528	8803	8743	8364		958.403	7557.91	7271.45	6769.38	941.904	8932.88	8674.05	8019.92		324.463	1.91616	0.543709	14.1549
	21.5	0.0215	422	8641	8303	8006		592.734	7306.92	7044.26	6593.09	582.53	8636.22	8403.04	7811.06		61.0664	0.00264185	1.20536	4.74652
	22.5	0.0225	369	8208	7982	7845		356.707	7066.86	6824.76	6421.87	350.566	8352.49	8141.2	7608.21		0.920899	2.54362	3.17532	7.1473
	23.5	0.0235	366	8117	7866	7573		208.921	6838.14	6613.58	6255.07	205.324	8082.16	7889.29	7410.6		70.5372	0.149513	0.0689851	3.48251
	24.5	0.0245	306	7780	7619	7367		119.109	6620.73	6411.23	6092.36	117.058	7825.2	7647.9	7217.83		116.663	0.262621	0.109645	3.02042
	25.5	0.0255	285	7551	7325	7165		66.1088	6414.21	6217.91	5933.65	64.9707	7581.11	7417.3	7029.8		169.87	0.120037	1.16309	2.55099
	26.5	0.0265	217	7230	7069	7001		35.7259	6217.86	6033.58	5779.08	35.1109	7349.03	7197.41	6846.68		152.459	1.95963	2.33272	3.40161
	27.5	0.0275	190	7071	6858	6864		18.8004	6030.78	5857.9	5628.9	18.4768	7127.93	6987.84	6668.76		154.843	0.45829	2.45833	5.55358
	28.5	0.0285	175	6884	6659	6732		9.63504	5852.06	5690.34	5483.4	9.46917	6916.69	6787.96	6496.38		156.574	0.155256	2.49743	8.24697
	29.5	0.0295	154	6738	6573	6441		4.80931	5680.81	5530.24	5342.83	4.72652	6714.28	6596.99	6329.84		144.692	0.0834976	0.0875267	1.91857
	30.5	0.0305	166	6490	6322	6211		2.33824	5516.24	5376.93	5207.36	2.29799	6519.77	6414.1	6169.34		161.436	0.136592	1.34164	0.27947
	31.5	0.0315	163	6257	6308	5925		1.10741	5357.73	5229.72	5077.05	1.08834	6332.42	6238.49	6014.96		160.831	0.909194	0.765962	1.36579
	32.5	0.0325	123	6081	6027	5918		0.510935	5204.79	5088	4951.86	0.502139	6151.66	6069.44	5866.64		121.998	0.821168	0.298819	0.445713
	33.5	0.0335	103	6059	5949	5817		0.229662	5057.09	4951.27	4831.64	0.225708	5977.1	5906.33	5724.22		102.549	1.10717	0.306102	1.47993
	34.5	0.0345	109	5823	5663	5720		0.100578	4914.41	4819.1	4716.17	0.0988467	5808.46	5748.66	5587.41		108.802	0.0363189	1.29586	3.07324
	35.5	0.0355	80	5746	5568	5460		0.0429171	4776.62	4691.19	4605.16	0.0421783	5645.6	5596.08	5455.9		79.9157	1.75432	0.141638	0.00308263
	36.5	0.0365	80	5616	5507	5344		0.0178439	4643.65	4567.32	4498.3	0.0175367	5488.44	5448.32	5329.29		79.9649	2.89731	0.625234	0.0405009
	37.5	0.0375	73	5386	5236	5169		0.00722939	4515.47	4447.35	4395.24	0.00710494	5336.94	5305.21	5207.2		72.9858	0.446819	0.914904	0.282248
	38.5	0.0385	66	5369	5266	5065		0.00285418	4392.06	4331.2	4295.68	0.00280505	5191.08	5166.66	5089.24		65.9944	5.89611	1.87407	0.115996
	39.5	0.0395	60	5095	5106	5001		0.00109811	4273.38	4218.82	4199.3	0.00107921	5050.81	5032.6	4975.06		59.9978	0.383302	1.05503	0.134552
	40.5	0.0405	68	5049	4687	4907		0.000411728	4159.38	4110.2	4105.85	0.00040464	4916.07	4903.02	4864.34		67.9992	3.4997	9.9566	0.370872
	41.5	0.0415	58	4841	4893	4611		0.000150448	4049.99	4005.31	4015.08	0.000147858	4786.77	4777.9	4756.8		57.9997	0.607423	2.70742	4.61051
	42.5	0.0425	53	4735	4731	4687		5.35784e-05	3945.08	3904.14	3926.81	5.2656e-05	4662.78	4657.22	4652.23		52.9999	1.10149	1.15074	0.257981
	43.5	0.0435	40	4655	4553	4481		1.85964e-05	3844.52	3806.65	3840.88	1.82763e-05	4543.93	4540.93	4550.43		40	2.65034	0.0320208	1.07564
	44.5	0.0445	49	4477	4415	4366		6.29095e-06	3748.13	3712.8	3757.18	6.18265e-06	4430.01	4428.97	4451.26		49	0.49325	0.0442273	1.6651
	45.5	0.0455	49	4285	4299	4383		2.07425e-06	3655.73	3622.52	3675.62	2.03855e-06	4320.8	4321.28	4354.64		49	0.299026	0.11542	0.183497
	46.5	0.0465	30	4295	4385	4300		6.66615e-07	3567.1	3535.71	3596.15	6.5514e-07	4216.04	4217.72	4260.49		30	1.45158	6.38137	0.363043
	47.5	0.0475	36	4211	4025	4080		2.08817e-07	3482.02	3452.26	3518.74	2.05222e-07	4115.48	4118.18	4168.77		36	2.16669	2.15696	1.93133
	48.5	0.0485	34	4107	3987	4109		6.37589e-08	3400.26	3372.04	3443.35	6.26613e-08	4018.85	4022.49	4079.45		34	1.89216	0.315832	0.212459
	49.5	0.0495	31	4031	4022	3909		1.89762e-08	3321.59	3294.91	3369.98	1.86495e-08	3925.87	3930.48	3992.53		31	2.7419	2.08268	1.78508
	50.5	0.0505	16	3981	3890	4007		5.50526e-09	3245.8	3220.71	3298.63	5.41049e-09	3836.29	3841.96	3908		16	5.26051	0.593189	2.44573
	51.5	0.0515	21	3796	3789	3830		1.55688e-09	3172.66	3149.28	3229.3	1.53007e-09	3749.85	3756.75	3825.86		21	0.561143	0.274462	0.00446624
	52.5	0.0525	28	3754	3729	3755		4.29184e-10	3101.99	3080.45	3161.98	4.21796e-10	3666.31	3674.64	3746.11		28	2.04813	0.792333	0.0210599
	53.5	0.0535	32	3665	3674	3714		1.15333e-10	3033.59	3014.05	3096.66	1.13348e-10	3585.47	3595.44	3668.72		32	1.72576	1.67979	0.551919
	54.5	0.0545	24	3555	3501	3622		3.02127e-11	2967.29	2949.93	3033.34	2.96926e-11	3507.11	3518.95	3593.7		24	0.645008	0.092018	0.221111
	55.5	0.0555	21	3641	3367	3556		7.71537e-12	2902.95	2887.92	2971.98	7.58255e-12	3431.07	3444.98	3521.01		21	12.1043	1.80603	0.344323
	56.5	0.0565	22	3480	3416	3381		1.9207e-12	2840.43	2827.88	2912.56	1.88764e-12	3357.17	3373.36	3450.61		22	4.33537	0.532317	1.43334
	57.5	0.0575	14	3336	3334	3321		4.66129e-13	2779.61	2769.67	2855.05	4.58105e-13	3285.28	3303.91	3382.47		14	0.771002	0.271506	1.1379
	58.5	0.0585	22	3201	3361	3262		1.1028e-13	2720.39	2713.15	2799.39	1.08382e-13	3215.29	3236.49	3316.53		22	0.0637918	4.6122	0.911659
	59.5	0.0595	20	3121	3181	3191		2.54355e-14	2662.68	2658.21	2745.53	2.49976e-14	3147.08	3170.96	3252.73		20	0.218004	0.0316871	1.19419
	60.5	0.0605	11	3075	3171	3089		5.71923e-15	2606.41	2604.75	2693.43	5.62077e-15	3080.58	3107.18	3191		11	0.0101342	1.28429	3.36791
	61.5	0.0615	16	3027	3111	3059		1.2537e-15	2551.53	2552.66	2643	1.23212e-15	3015.71	3045.05	3131.26		16	0.0420906	1.39793	1.70682
	62.5	0.0625	24	3105	2963	2954		2.67925e-16	2497.98	2501.88	2594.19	2.63313e-16	2952.42	2984.47	3073.43		24	7.49819	0.155558	4.82857
	63.5	0.0635	11	2930	2934	3013		5.58211e-17	2445.71	2452.31	2546.93	5.48602e-17	2890.64	2925.34	3017.43		11	0.528614	0.0255322	0.00651636
	64.5	0.0645	16	2872	2968	3005		1.13385e-17	2394.71	2403.91	2501.13	1.11433e-17	2830.36	2867.61	2963.17		16	0.603731	3.39582	0.582199
	65.5	0.0655	11	2808	2876	2746		2.24535e-18	2344.93	2356.62	2456.73	2.20669e-18	2771.53	2811.19	2910.57		11	0.473695	1.4604	9.86255
	66.5	0.0665	12	2814	2817	2762		4.33499e-19	2296.36	2310.39	2413.64	4.26037e-19	2714.13	2756.05	2859.53		12	3.54469	1.3189	3.44374
	67.5	0.0675	18	2695	2689	2882		8.15968e-20	2248.99	2265.19	2371.81	8.01921e-20	2658.13	2702.13	2809.96		18	0.504431	0.0640772	1.80051
	68.5	0.0685	13	2688	2633	2793		1.49741e-20	2202.78	2220.98	2331.15	1.47163e-20	2603.52	2649.4	2761.79		13	2.65514	0.102092	0.348646
	69.5	0.0695	11	2731	2602	2580		2.67912e-21	2157.74	2177.75	2291.6	2.633e-21	2550.28	2597.82	2714.93		11	11.9591	0.00670564	7.05712
	70.5	0.0705	13	2619	2605	2613		4.67339e-22	2113.83	2135.47	2253.08	4.59294e-22	2498.39	2547.38	2669.31		13	5.55439	1.27431	1.21329
	71.5	0.0715	7	2582	2530	2492		7.94808e-23	2071.06	2094.12	2215.54	7.81125e-23	2447.84	2498.06	2624.83		7	6.97129	0.403248	7.08046
	72.5	0.0725	9	2502	2409	2544		1.31791e-23	2029.41	2053.69	2178.92	1.29522e-23	2398.6	2449.83	2581.44		9	4.27303	0.692043	0.551151
	73.5	0.0735	10	2408	2520	2543		2.1306e-24	1988.85	2014.17	2143.16	2.09393e-24	2350.67	2402.68	2539.08		10	1.36501	5.46153	0.00605236
	74.5	0.0745	2	2343	2504	2479		3.35829e-25	1949.38	1975.54	2108.21	3.30047e-25	2304.01	2356.61	2497.67		2	0.648678	8.67603	0.140565
	75.5	0.0755	2	2308	2361	2327		5.16098e-26	1910.97	1937.8	2074.02	5.07213e-26	2258.62	2311.59	2457.16		2	1.05646	1.03415	7.28042
	76.5	0.0765	5	2208	2257	2345		7.733e-27	1873.61	1900.94	2040.54	7.59988e-27	2214.46	2267.61	2417.5		5	0.0189178	0.0499199	2.24168
	77.5	0.0775	8	2248	2170	2337		1.12971e-27	1837.27	1864.94	2007.75	1.11026e-27	2171.52	2224.68	2378.65		8	2.60217	1.37771	0.742355
	78.5	0.0785	9	2230	2219	2202		1.60913e-28	1801.94	1829.81	1975.6	1.58143e-28	2129.76	2182.76	2340.56		9	4.50626	0.5917	8.71933
	79.5	0.0795	9	2163	2185	2137		2.23472e-29	1767.59	1795.52	1944.07	2.19625e-29	2089.15	2141.86	2303.2		9	2.52135	0.851568	12.9262
	80.5	0.0805	6	2141	2125	2155		3.02597e-30	1734.18	1762.07	1913.12	2.97388e-30	2049.67	2101.96	2266.53		6	3.89562	0.249738	5.77262
	81.5	0.0815	6	2049	2066	2032		3.99499e-31	1701.71	1729.45	1882.73	3.92622e-31	2011.29	2063.05	2230.53		6	0.693947	0.00422055	19.3972
	82.5	0.0825	6	2129	2124	2112		5.14256e-32	1670.14	1697.64	1852.88	5.05403e-32	1973.97	2025.1	2195.17		6	11.2884	4.60501	3.27523
	83.5	0.0835	3	2061	1954	2151		6.45442e-33	1639.44	1666.63	1823.55	6.3433e-33	1937.69	1988.11	2160.43		3	7.37799	0.595371	0.041316
	84.5	0.0845	7	1963	2033	2056		7.89859e-34	1609.58	1636.4	1794.73	7.76262e-34	1902.4	1952.05	2126.28		7	1.87095	3.22321	2.4027
	85.5	0.0855	1	2019	1830	2037		9.42452e-35	1580.53	1606.94	1766.41	9.26228e-35	1868.07	1916.91	2092.73		1	11.2827	4.12753	1.52457
	86.5	0.0865	4	1945	1953	1902		1.09645e-35	1552.28	1578.24	1738.57	1.07757e-35	1834.67	1882.67	2059.74		4	6.25826	2.53294	13.0824
	87.5	0.0875	7	1831	1914	1912		1.24376e-36	1524.78	1550.26	1711.2	1.22234e-36	1802.17	1849.3	2027.32		7	0.454023	2.18724	6.95521
	88.5	0.0885	8	1959	1901	1865		1.37564e-37	1498	1523.01	1684.3	1.35195e-37	1770.52	1816.78	1995.45		8	18.1335	3.73095	9.12407
	89.5	0.0895	0	1804	1802	1850		1.48352e-38	1471.93	1496.45	1657.86	1.45798e-38	1739.71	1785.1	1964.12		2.12571e-76	2.29149	0.158527	7.03965
	90.5	0.0905	5	1820	1820	1781		1.55994e-39	1446.52	1470.56	1631.87	1.53309e-39	1709.68	1754.22	1933.33		5	6.68709	2.37741	13.0291
	91.5	0.0915	5	1745	1717	1841		1.59936e-40	1421.76	1445.33	1606.33	1.57183e-40	1680.42	1724.13	1903.08		5	2.39033	0.0295777	2.09316
	92.5	0.0925	4	1746	1760	1820		1.59886e-41	1397.62	1420.74	1581.24	1.57134e-41	1651.88	1694.79	1873.35		4	5.07356	2.41608	1.5639
	93.5	0.0935	4	1714	1695	1745		1.55848e-42	1374.07	1396.76	1556.59	1.53165e-42	1624.04	1666.19	1844.15		4	4.72114	0.489751	5.63367
	94.5	0.0945	6	1637	1674	1726		1.48123e-43	1351.08	1373.38	1532.39	1.45573e-43	1596.88	1638.29	1815.47		6	0.983411	0.761566	4.63799
	95.5	0.0955	4	1689	1698	1693		1.37268e-44	1328.64	1350.57	1508.62	1.34905e-44	1570.35	1611.09	1787.31		4	8.33486	4.44882	5.25385
	96.5	0.0965	0	1629	1697	1717		1.24036e-45	1306.72	1328.31	1485.28	1.21901e-45	1544.44	1584.54	1759.67		1.48598e-90	4.38954	7.45322	1.06034
	97.5	0.0975	1	1589	1683	1644		1.09284e-46	1285.29	1306.59	1462.38	1.07403e-46	1519.12	1558.62	1732.54		1	3.07354	9.19188	4.76821
	98.5	0.0985	1	1630	1578	1571		9.38856e-48	1264.34	1285.38	1439.91	9.22694e-48	1494.36	1533.32	1705.92		1	11.2879	1.26516	11.5866
	99.5	0.0995	0	1580	1579	1584		7.86454e-49	1243.85	1264.66	1417.87	7.72915e-49	1470.14	1508.6	1679.8		5.97398e-97	7.63908	3.1385	5.79422
	100.5	0.1005	3	1502	1575	1527		6.42364e-50	1223.8	1244.41	1396.25	6.31306e-50	1446.44	1484.45	1654.19		3	2.05529	5.20559	10.5942
	101.5	0.1015	1	1478	1517	1496		5.11592e-51	1204.17	1224.62	1375.06	5.02785e-51	1423.24	1460.84	1629.08		1	2.0289	2.07872	11.8378
	102.5	0.1025	3	1436	1523	1529		3.97285e-52	1184.95	1205.27	1354.28	3.90446e-52	1400.52	1437.76	1604.46		3	0.876592	4.77103	3.72384
	103.5	0.1035	3	1380	1457	1525		3.00827e-53	1166.12	1186.34	1333.91	2.95648e-53	1378.26	1415.17	1580.33		3	0.0021821	1.2009	2.00722
	104.5	0.1045	2	1390	1474	1514		2.2211e-54	1147.67	1167.8	1313.95	2.18286e-54	1356.46	1393.06	1556.68		2	0.809525	4.44417	1.20312
	105.5	0.1055	3	1369	1401	1377		1.59903e-55	1129.58	1149.66	1294.39	1.57151e-55	1335.08	1371.42	1533.51		3	0.840556	0.624638	17.7889
	106.5	0.1065	3	1440	1461	1399		1.1225e-56	1111.85	1131.88	1275.23	1.10317e-56	1314.12	1350.21	1510.81		3	11.0044	8.40072	8.93632
	107.5	0.1075	4	1430	1367	1438		7.68339e-58	1094.46	1114.46	1256.47	7.55112e-58	1293.56	1329.44	1488.58		4	13.0175	1.0322	1.77897
	108.5	0.1085	4	1391	1308	1408		5.12814e-59	1077.4	1097.39	1238.08	5.03986e-59	1273.4	1309.07	1466.8		4	9.94209	0.000871074	2.45572
	109.5	0.1095	3	1313	1295	1339		3.3374e-60	1060.66	1080.64	1220.08	3.27995e-60	1253.62	1289.09	1445.47		3	2.68522	0.026956	8.46665
	110.5	0.1105	3	1291	1319	1300		2.11786e-61	1044.24	1064.22	1202.45	2.08141e-61	1234.22	1269.49	1424.59		3	2.49755	1.85806	11.9403
	111.5	0.1115	3	1295	1267	1301		1.31048e-62	1028.13	1048.09	1185.19	1.28792e-62	1215.18	1250.26	1404.14		3	4.92046	0.221105	8.17598
	112.5	0.1125	3	1226	1239	1277		7.90686e-64	1012.32	1032.27	1168.28	7.77075e-64	1196.49	1231.38	1384.11		3	0.710314	0.0468311	8.98336
	113.5	0.1135	2	1280	1246	1346		4.65181e-65	996.811	1016.72	1151.73	4.57173e-65	1178.15	1212.84	1364.49		2	8.10365	0.882342	0.254041
	114.5	0.1145	2	1286	1196	1270		2.6686e-66	981.586	1001.46	1135.51	2.62266e-66	1160.16	1194.63	1345.28		2	12.3139	0.00156482	4.46253
	115.5	0.1155	1	1169	1185	1239		1.49276e-67	966.647	986.459	1119.63	1.46706e-67	1142.5	1176.74	1326.47		1	0.600599	0.0575797	6.17492
	116.5	0.1165	4	1159	1194	1236		8.14219e-69	951.988	971.719	1104.08	8.00203e-69	1125.18	1159.16	1308.04		4	0.987057	1.0168	4.19887
	117.5	0.1175	1	1078	1100	1263		4.3305e-70	937.605	957.231	1088.84	4.25595e-70	1108.18	1141.87	1289.99		1	0.844786	1.59401	0.57668
	118.5	0.1185	1	1149	1162	1247		2.24585e-71	923.495	942.988	1073.91	2.20719e-71	1091.5	1124.88	1272.3		1	2.8775	1.1856	0.513347
	119.5	0.1195	2	1126	1146	1146		1.13572e-72	909.653	928.983	1059.28	1.11617e-72	1075.14	1108.18	1254.97		2	2.29723	1.24831	10.3616
	120.5	0.1205	0	1187	1102	1124		5.60026e-74	896.078	915.212	1044.95	5.50386e-74	1059.1	1091.75	1237.98		3.02924e-147	13.7823	0.095349	11.5589
	121.5	0.1215	3	1098	1080	1170		2.69273e-75	882.766	901.668	1030.89	2.64638e-75	1043.36	1075.59	1221.33		3	2.71893	0.0179796	2.25208
	122.5	0.1225	0	1080	1121	1088		1.26249e-76	869.714	888.348	1017.11	1.24075e-76	1027.94	1059.7	1205		1.53947e-152	2.50996	3.35169	12.5828
	123.5	0.1235	3	1042	1132	1077		5.77176e-78	856.92	875.247	1003.59	5.6724e-78	1012.81	1044.08	1188.99		3	0.817502	6.82933	11.6456
	124.5	0.1245	2	1055	1063	1086		2.573e-79	844.382	862.36	990.335	2.5287e-79	997.995	1028.7	1173.28		2	3.08021	1.10658	7.0152
	125.5	0.1255	2	1045	1059	1099		1.11846e-80	832.097	849.685	977.325	1.0992e-80	983.475	1013.58	1157.87		2	3.62233	1.94778	3.15352
	126.5	0.1265	2	1058	1094	972		4.74079e-82	820.064	837.219	964.554	4.65918e-82	969.252	998.712	1142.74		2	7.44438	8.29966	29.9923
	127.5	0.1275	1	1038	999	1038		1.95944e-83	808.279	824.958	952.016	1.92571e-83	955.324	984.086	1127.89		1	6.58507	0.222657	7.78385
	128.5	0.1285	1	999	906	1067		7.89703e-85	796.742	812.9	939.702	7.76109e-85	941.688	969.702	1113.3		1	3.28796	4.47893	2.0089
	129.5	0.1295	4	989	1027	1010		3.10347e-86	785.45	801.042	927.604	3.05004e-86	928.341	955.557	1098.97		4	3.7204	4.96991	7.83645
	130.5	0.1305	0	973	1009	940		1.18928e-87	774.4	789.383	915.715	1.1688e-87	915.282	941.649	1084.88		1.3661e-174	3.42384	4.49568	22.3299
	131.5	0.1315	1	979	966	1009		4.44396e-89	763.592	777.921	904.027	4.36746e-89	902.507	927.976	1071.03		1	5.97672	1.49674	3.81371
	132.5	0.1325	2	891	902	1006		1.61924e-90	753.022	766.653	892.533	1.59136e-90	890.014	914.535	1057.42		2	0.00109143	0.174185	2.62775
	133.5	0.1335	1	943	969	940		5.75311e-92	742.688	755.579	881.226	5.65407e-92	877.8	901.324	1044.02		1	4.50795	4.72658	11.5106
	134.5	0.1345	1	853	943	943		1.99319e-93	732.588	744.696	870.099	1.95888e-93	865.863	888.342	1030.84		1	0.193985	3.16809	8.1817
	135.5	0.1355	3	938	941	1015		6.73362e-95	722.721	734.003	859.146	6.6177e-95	854.201	875.587	1017.86		3	7.48651	4.54715	0.00806197
	136.5	0.1365	1	913	896	907		2.21821e-96	713.082	723.5	848.361	2.18002e-96	842.809	863.057	1005.08		1	5.3963	1.21117	10.6066
	137.5	0.1375	2	877	841	902		7.12542e-98	703.671	713.184	837.737	7.00276e-98	831.685	850.752	992.496		2	2.34147	0.11308	9.07928
	138.5	0.1385	1	844	883	916		2.23189e-99	694.483	703.055	827.268	2.19347e-99	820.826	838.669	980.094		1	0.636304	2.22565	4.48472
	139.5	0.1395	0	870	877	833		6.81697e-101	685.517	693.111	816.95	6.69961e-101	810.229	826.807	967.87		4.48848e-201	4.10645	2.87268	21.8365
	140.5	0.1405	1	860	868	865		2.03032e-102	676.77	683.351	806.777	1.99537e-102	799.89	815.165	955.817		1	4.20142	3.21609	9.53496
	141.5	0.1415	1	866	831	897		5.89648e-104	668.238	673.775	796.744	5.79498e-104	789.806	803.741	943.93		1	6.70381	0.894174	2.45537
	142.5	0.1425	2	854	910	822		1.66985e-105	659.919	664.38	786.846	1.6411e-105	779.974	792.534	932.204		2	6.41669	15.1629	14.7749
	143.5	0.1435	0	765	820	823		4.61125e-107	651.81	655.166	777.079	4.53187e-107	770.39	781.543	920.633		2.05378e-213	0.0379701	1.80362	11.5822
	144.5	0.1445	1	804	835	873		1.2417e-108	643.907	646.131	767.438	1.22032e-108	761.049	770.765	909.211		1	2.29449	4.94143	1.50198
	145.5	0.1455	2	763	762	828		3.2604e-110	636.208	637.275	757.92	3.20427e-110	751.949	760.201	897.934		2	0.160052	0.00424929	5.90678
	146.5	0.1465	0	806	714	881		8.34799e-112	628.709	628.596	748.521	8.20429e-112	743.086	749.847	886.798		6.73103e-223	4.91095	1.79972	0.0381629
	147.5	0.1475	1	767	785	820		2.08426e-113	621.406	620.092	739.236	2.04838e-113	734.454	739.703	875.799		1	1.381	2.61382	3.79697
	148.5	0.1485	0	777	800	811		5.07432e-115	614.296	611.762	730.064	4.98697e-115	726.051	729.766	864.932		2.48698e-229	3.34079	6.16598	3.5865
	149.5	0.1495	0	715	767	761		1.20465e-116	607.376	603.605	721	1.18392e-116	717.872	720.036	854.194		1.40166e-232	0.0115361	2.87567	11.4127
	150.5	0.1505	0	737	751	769		2.78872e-118	600.642	595.619	712.042	2.74071e-118	709.913	710.51	843.581		7.51151e-236	0.995552	2.18305	7.23318
	151.5	0.1515	1	757	741	741		6.29515e-120	594.09	587.803	703.187	6.18678e-120	702.169	701.186	833.09		1	3.97154	2.13923	11.4448
	152.5	0.1525	1	744	712	731		1.38569e-121	587.717	580.155	694.433	1.36184e-121	694.636	692.062	822.719		1	3.27525	0.558296	11.508
	153.5	0.1535	0	706	692	759		2.9743e-123	581.518	572.673	685.777	2.9231e-123	687.31	683.137	812.464		8.54453e-246	0.494774	0.113505	3.76603
	154.5	0.1545	2	695	737	736		6.22535e-125	575.491	565.356	677.218	6.11818e-125	680.186	674.409	802.323		2	0.315746	5.3157	5.97661
	155.5	0.1555	2	698	719	737		1.27058e-126	569.631	558.201	668.752	1.2487e-126	673.26	665.874	792.294		2	0.876865	3.9254	4.14851
	156.5	0.1565	0	678	717	723		2.52871e-128	563.935	551.207	660.38	2.48518e-128	666.527	657.531	782.375		6.1761e-256	0.194128	4.9324	4.876
	157.5	0.1575	1	691	692	713		4.90745e-130	558.398	544.373	652.098	4.82297e-130	659.983	649.378	772.563		1	1.39224	2.6252	4.97575
	158.5	0.1585	0	643	685	675		9.28695e-132	553.017	537.695	643.905	9.12708e-132	653.623	641.412	762.857		8.33036e-263	0.175512	2.77363	11.4352
	159.5	0.1595	1	635	655	676		1.71376e-133	547.787	531.171	635.8	1.68426e-133	647.443	633.63	753.255		1	0.243816	0.697211	8.82883
	160.5	0.1605	1	655	618	703		3.08382e-135	542.706	524.8	627.782	3.03074e-135	641.437	626.031	743.756		1	0.280835	0.104352	2.36276
	161.5	0.1615	0	596	647	685		5.41114e-137	537.769	518.58	619.85	5.31798e-137	635.602	618.61	734.358		2.8281e-273	2.63144	1.2457	3.55653
	162.5	0.1625	0	595	675	690		9.25867e-139	532.973	512.508	612.003	9.09928e-139	629.933	611.367	725.061		8.2797e-277	2.05096	5.99873	1.78154
	163.5	0.1635	0	633	613	675		1.54479e-140	528.313	506.582	604.239	1.5182e-140	624.425	604.298	715.863		2.30493e-280	0.116151	0.123535	2.47375
	164.5	0.1645	0	627	590	615		2.51335e-142	523.786	500.799	596.558	2.47008e-142	619.075	597.4	706.763		6.1013e-284	0.10018	0.0928105	13.6919
	165.5	0.1655	0	580	636	620		3.98747e-144	519.387	495.158	588.96	3.91882e-144	613.876	590.67	697.761		1.53572e-287	1.97861	3.23078	9.75294
	166.5	0.1665	1	608	587	645		6.16884e-146	515.114	489.656	581.443	6.06264e-146	608.826	584.106	688.856		1	0.00112152	0.0142643	2.98196
	167.5	0.1675	1	587	598	607		9.30618e-148	510.963	484.289	574.008	9.14597e-148	603.919	577.705	680.047		1	0.487654	0.688772	8.79059
	168.5	0.1685	0	590	588	624		1.36899e-149	506.929	479.057	566.653	1.34543e-149	599.152	571.463	671.334		1.81017e-298	0.141951	0.465066	3.59054
	169.5	0.1695	0	592	527	603		1.96379e-151	503.01	473.956	559.379	1.92998e-151	594.519	565.378	662.716		3.72482e-302	0.0107196	2.79489	5.91372
	170.5	0.1705	0	533	609	614		2.74694e-153	499.201	468.984	552.185	2.69965e-153	590.017	559.447	654.192		7.28813e-306	6.09942	4.03198	2.631
	171.5	0.1715	0	570	627	638		3.74686e-155	495.499	464.138	545.07	3.68236e-155	585.642	553.667	645.764		0	0.429274	8.577	0.0944717
	172.5	0.1725	0	566	644	654		4.98366e-157	491.902	459.416	538.035	4.89786e-157	581.39	548.034	637.429		0	0.418464	14.3005	0.419881
	173.5	0.1735	1	550	571	587		6.46386e-159	488.404	454.815	531.079	6.35259e-159	577.256	542.545	629.188		1	1.3507	1.41799	3.03209
	174.5	0.1745	0	533	529	564		8.17521e-161	485.003	450.332	524.203	8.03448e-161	573.236	537.198	621.041		0	3.03746	0.127051	5.76895
	175.5	0.1755	0	554	531	572		1.00825e-162	481.696	445.966	517.405	9.90896e-163	569.328	531.989	612.988		0	0.424066	0.00184384	2.93704
	176.5	0.1765	0	532	518	555		1.21256e-164	478.479	441.713	510.686	1.19169e-164	565.525	526.916	605.028		0	2.11269	0.153466	4.50948
	177.5	0.1775	0	502	515	594		1.422e-166	475.349	437.571	504.046	1.39753e-166	561.826	521.975	597.161		0	7.12986	0.0944593	0.0168208
	178.5	0.1785	2	487	508	565		1.62616e-168	472.304	433.537	497.485	1.59816e-168	558.227	517.162	589.387		2	10.4173	0.165257	1.05265
	179.5	0.1795	0	496	534	570		1.81338e-170	469.339	429.608	491.002	1.78216e-170	554.723	512.476	581.707		0	6.95235	0.867559	0.240454
	180.5	0.1805	0	515	501	548		1.97187e-172	466.453	425.783	484.598	1.93792e-172	551.311	507.913	574.12		0	2.5602	0.0953811	1.24499
	181.5	0.1815	0	467	463	551		2.09089e-174	463.641	422.057	478.272	2.0549e-174	547.989	503.469	566.626		0	14.0453	3.53727	0.443134
	182.5	0.1825	1	511	485	515		2.16197e-176	460.902	418.43	472.025	2.12476e-176	544.751	499.142	559.225		1	2.22926	0.412387	3.79771
	183.5	0.1835	1	482	465	531		2.17989e-178	458.233	414.899	465.856	2.14236e-178	541.596	494.929	551.916		1	7.36876	1.92639	0.823907
	184.5	0.1845	0	508	464	526		2.14329e-180	455.631	411.46	459.766	2.1064e-180	538.521	490.827	544.701		0	1.83369	1.55108	0.664876
	185.5	0.1855	0	502	495	545		2.05492e-182	453.093	408.111	453.754	2.01954e-182	535.521	486.833	537.578		0	2.23837	0.134753	0.101068
	186.5	0.1865	0	461	461	494		1.9212e-184	450.617	404.851	447.82	1.88813e-184	532.594	482.943	530.548		0	11.1188	1.04449	2.704
	187.5	0.1875	0	450	462	506		1.75152e-186	448.2	401.676	441.965	1.72137e-186	529.738	479.156	523.611		0	14.1292	0.637057	0.612932
	188.5	0.1885	0	473	478	473		1.55712e-188	445.84	398.584	436.187	1.53032e-188	526.949	475.467	516.766		0	6.15323	0.0134192	4.0496
	189.5	0.1895	0	471	435	508		1.34989e-190	443.535	395.572	430.487	1.32665e-190	524.224	471.875	510.013		0	6.0145	3.12593	0.00797991
	190.5	0.1905	0	445	479	521		1.14113e-192	441.282	392.639	424.866	1.12149e-192	521.562	468.376	503.353		0	13.1724	0.235614	0.597727
	191.5	0.1915	0	466	449	452		9.40679e-195	439.08	389.782	419.321	9.24485e-195	518.959	464.969	496.785		0	6.01849	0.567915	4.43731
	192.5	0.1925	0	415	455	514		7.56157e-197	436.925	386.999	413.855	7.4314e-197	516.412	461.649	490.308		0	24.7819	0.0971504	1.09203
	193.5	0.1935	0	426	415	468		5.92719e-199	434.817	384.288	408.465	5.82515e-199	513.921	458.414	483.923		0	18.1456	4.54162	0.541768
	194.5	0.1945	0	459	435	445		4.53056e-201	432.753	381.646	403.153	4.45256e-201	511.481	455.262	477.63		0	6.00059	0.943793	2.39256
	195.5	0.1955	0	370	408	478		3.37692e-203	430.731	379.07	397.918	3.31878e-203	509.092	452.19	471.427		0	52.2878	4.78622	0.0903826
	196.5	0.1965	0	403	436	461		2.45446e-205	428.75	376.56	392.759	2.4122e-205	506.75	449.196	465.315		0	26.7098	0.399397	0.0403968
	197.5	0.1975	0	384	398	435		1.73963e-207	426.808	374.113	387.677	1.70968e-207	504.454	446.277	459.294		0	37.7843	5.85597	1.3568
	198.5	0.1985	0	403	395	405		1.20233e-209	424.902	371.727	382.671	1.18164e-209	502.202	443.431	453.363		0	24.4193	5.93807	5.77529

## Sheet: Data
							Ro	100
							Ri	75
							rho	7.7
							x0	13.8
	z	200	0	44	90
	L	0	50	58.1253	87.178
	rhoa	0	385	447.565	671.27
	PL	0	27.8986	32.4322	48.6428
		E:\TN_24P_Sims\Steel_Shell_Cal_r_100.xp	E:\TN_24P_Sims\Steel_Shell_Cal_r_0.xp	E:\TN_24P_Sims\Steel_Shell_Cal_r_22.xp	E:\TN_24P_Sims\Steel_Shell_Cal_r_45.xp
	0.5	845910	5542	4924	3923
	1.5	200960	10673	9618	7955
	2.5	89316	12961	11740	9831
	3.5	47510	13655	12747	11052
	4.5	28403	14047	13055	11476
	5.5	18380	14029	13126	11582
	6.5	12225	13650	12849	11614
	7.5	8616	13703	12842	11707
	8.5	6365	13186	12414	11418
	9.5	4734	12755	12187	11089
	10.5	3602	12113	11799	10851
	11.5	2811	11985	11551	10518
	12.5	2189	11592	11009	10267
	13.5	1709	11008	10648	9833
	14.5	1401	10648	10449	9626
	15.5	1164	10255	9941	9563
	16.5	1009	10026	9636	9315
	17.5	844	9622	9416	8980
	18.5	760	9234	9208	8668
	19.5	639	9080	8991	8436
	20.5	528	8803	8743	8364
	21.5	422	8641	8303	8006
	22.5	369	8208	7982	7845
	23.5	366	8117	7866	7573
	24.5	306	7780	7619	7367
	25.5	285	7551	7325	7165
	26.5	217	7230	7069	7001
	27.5	190	7071	6858	6864
	28.5	175	6884	6659	6732
	29.5	154	6738	6573	6441
	30.5	166	6490	6322	6211
	31.5	163	6257	6308	5925
	32.5	123	6081	6027	5918
	33.5	103	6059	5949	5817
	34.5	109	5823	5663	5720
	35.5	80	5746	5568	5460
	36.5	80	5616	5507	5344
	37.5	73	5386	5236	5169
	38.5	66	5369	5266	5065
	39.5	60	5095	5106	5001
	40.5	68	5049	4687	4907
	41.5	58	4841	4893	4611
	42.5	53	4735	4731	4687
	43.5	40	4655	4553	4481
	44.5	49	4477	4415	4366
	45.5	49	4285	4299	4383
	46.5	30	4295	4385	4300
	47.5	36	4211	4025	4080
	48.5	34	4107	3987	4109
	49.5	31	4031	4022	3909
	50.5	16	3981	3890	4007
	51.5	21	3796	3789	3830
	52.5	28	3754	3729	3755
	53.5	32	3665	3674	3714
	54.5	24	3555	3501	3622
	55.5	21	3641	3367	3556
	56.5	22	3480	3416	3381
	57.5	14	3336	3334	3321
	58.5	22	3201	3361	3262
	59.5	20	3121	3181	3191
	60.5	11	3075	3171	3089
	61.5	16	3027	3111	3059
	62.5	24	3105	2963	2954
	63.5	11	2930	2934	3013
	64.5	16	2872	2968	3005
	65.5	11	2808	2876	2746
	66.5	12	2814	2817	2762
	67.5	18	2695	2689	2882
	68.5	13	2688	2633	2793
	69.5	11	2731	2602	2580
	70.5	13	2619	2605	2613
	71.5	7	2582	2530	2492
	72.5	9	2502	2409	2544
	73.5	10	2408	2520	2543
	74.5	2	2343	2504	2479
	75.5	2	2308	2361	2327
	76.5	5	2208	2257	2345
	77.5	8	2248	2170	2337
	78.5	9	2230	2219	2202
	79.5	9	2163	2185	2137
	80.5	6	2141	2125	2155
	81.5	6	2049	2066	2032
	82.5	6	2129	2124	2112
	83.5	3	2061	1954	2151
	84.5	7	1963	2033	2056
	85.5	1	2019	1830	2037
	86.5	4	1945	1953	1902
	87.5	7	1831	1914	1912
	88.5	8	1959	1901	1865
	89.5	0	1804	1802	1850
	90.5	5	1820	1820	1781
	91.5	5	1745	1717	1841
	92.5	4	1746	1760	1820
	93.5	4	1714	1695	1745
	94.5	6	1637	1674	1726
	95.5	4	1689	1698	1693
	96.5	0	1629	1697	1717
	97.5	1	1589	1683	1644
	98.5	1	1630	1578	1571
	99.5	0	1580	1579	1584
	100.5	3	1502	1575	1527
	101.5	1	1478	1517	1496
	102.5	3	1436	1523	1529
	103.5	3	1380	1457	1525
	104.5	2	1390	1474	1514
	105.5	3	1369	1401	1377
	106.5	3	1440	1461	1399
	107.5	4	1430	1367	1438
	108.5	4	1391	1308	1408
	109.5	3	1313	1295	1339
	110.5	3	1291	1319	1300
	111.5	3	1295	1267	1301
	112.5	3	1226	1239	1277
	113.5	2	1280	1246	1346
	114.5	2	1286	1196	1270
	115.5	1	1169	1185	1239
	116.5	4	1159	1194	1236
	117.5	1	1078	1100	1263
	118.5	1	1149	1162	1247
	119.5	2	1126	1146	1146
	120.5	0	1187	1102	1124
	121.5	3	1098	1080	1170
	122.5	0	1080	1121	1088
	123.5	3	1042	1132	1077
	124.5	2	1055	1063	1086
	125.5	2	1045	1059	1099
	126.5	2	1058	1094	972
	127.5	1	1038	999	1038
	128.5	1	999	906	1067
	129.5	4	989	1027	1010
	130.5	0	973	1009	940
	131.5	1	979	966	1009
	132.5	2	891	902	1006
	133.5	1	943	969	940
	134.5	1	853	943	943
	135.5	3	938	941	1015
	136.5	1	913	896	907
	137.5	2	877	841	902
	138.5	1	844	883	916
	139.5	0	870	877	833
	140.5	1	860	868	865
	141.5	1	866	831	897
	142.5	2	854	910	822
	143.5	0	765	820	823
	144.5	1	804	835	873
	145.5	2	763	762	828
	146.5	0	806	714	881
	147.5	1	767	785	820
	148.5	0	777	800	811
	149.5	0	715	767	761
	150.5	0	737	751	769
	151.5	1	757	741	741
	152.5	1	744	712	731
	153.5	0	706	692	759
	154.5	2	695	737	736
	155.5	2	698	719	737
	156.5	0	678	717	723
	157.5	1	691	692	713
	158.5	0	643	685	675
	159.5	1	635	655	676
	160.5	1	655	618	703
	161.5	0	596	647	685
	162.5	0	595	675	690
	163.5	0	633	613	675
	164.5	0	627	590	615
	165.5	0	580	636	620
	166.5	1	608	587	645
	167.5	1	587	598	607
	168.5	0	590	588	624
	169.5	0	592	527	603
	170.5	0	533	609	614
	171.5	0	570	627	638
	172.5	0	566	644	654
	173.5	1	550	571	587
	174.5	0	533	529	564
	175.5	0	554	531	572
	176.5	0	532	518	555
	177.5	0	502	515	594
	178.5	2	487	508	565
	179.5	0	496	534	570
	180.5	0	515	501	548
	181.5	0	467	463	551
	182.5	1	511	485	515
	183.5	1	482	465	531
	184.5	0	508	464	526
	185.5	0	502	495	545
	186.5	0	461	461	494
	187.5	0	450	462	506
	188.5	0	473	478	473
	189.5	0	471	435	508
	190.5	0	445	479	521
	191.5	0	466	449	452
	192.5	0	415	455	514
	193.5	0	426	415	468
	194.5	0	459	435	445
	195.5	0	370	408	478
	196.5	0	403	436	461
	197.5	0	384	398	435
	198.5	0	403	395	405

## Sheet: FingerPrintUncertainty
		Steel_Shell
		TN_24P_5pct_60GWd_14d_1Bundle_DU								40	TN_24P_Full_5pct_60GWd_40y_Sinogram	68	134	1421.4	1.62834
		TN_24P_5pct_60GWd_14d_1Bundle_Fresh								80	TN_24P_Full_5pct_60GWd_80y_Sinogram	68	134	1420.5	1.62731
		TN_24P_5pct_60GWd_14d_1Bundle_Missing								-1	TN_24P_Full_5pct_Fresh_Sinogram	68	134	1456.8	1.6689
		TN_24P_5pct_60GWd_14d_1Bundle_Pb
		TN_24P_5pct_60GWd_14d_1Bundle_Steel
		TN_24P_Detector
		TN_24P_Full_5pct_60GWd_14d
		TN_24P_Full_5pct_60GWd_20y
		TN_24P_Full_5pct_60GWd_40y
		TN_24P_Full_5pct_60GWd_80y
		TN_24P_Full_5pct_Fresh
													ave	1148.72
													stdev	5.88516
													stdev/ave	0.00512323
														0.00114559
											file	x1	x2	sum	ave	center	width
											TN_24P_Full_5pct_Fresh_4_1	66	134	1141.7	16.546	0.034322	31.517			0	TN_24P_Full_5pct_60GWd_14d_Areal	63	138	12.928		1.00031
											TN_24P_Full_5pct_Fresh_4_10	66	134	1143.1	16.566	-0.024787	31.416			20	TN_24P_Full_5pct_60GWd_20y_Areal	63	138	12.93		1.00046
											TN_24P_Full_5pct_Fresh_4_2	66	134	1149.5	16.659	0.063642	31.347			40	TN_24P_Full_5pct_60GWd_40y_Areal	63	138	12.929		1.00039
											TN_24P_Full_5pct_Fresh_4_3	66	134	1147.9	16.637	-0.20458	31.258			80	TN_24P_Full_5pct_60GWd_80y_Areal	63	138	12.928		1.00031
											TN_24P_Full_5pct_Fresh_4_4	66	134	1157.6	16.777	-0.13481	31.432			-1	TN_24P_Full_5pct_Fresh_Areal	63	138	12.924		1
											TN_24P_Full_5pct_Fresh_4_5	66	134	1156.4	16.76	0.054732	31.409
											TN_24P_Full_5pct_Fresh_4_6	66	134	1142.6	16.56	0.34934	31.43
											TN_24P_Full_5pct_Fresh_4_7	66	134	1154	16.724	0.36099	31.389						ave	12.9927
											TN_24P_Full_5pct_Fresh_4_8	66	134	1150.5	16.674	0.1309	31.225						stdev	0.0213856
											TN_24P_Full_5pct_Fresh_4_9	66	134	1143.9	16.579	0.34541	31.293						stdev/ave	0.00164597
																							fractional D	0.00036805
										0	TN_24P_Full_5pct_60GWd_14d_Sinogram	65	136	1424.2	1.63155	0.975546	0.00111758		0.0247049		10_Areal	63	138	13.004	0.1711	-0.24504	32.957
										40	TN_24P_Full_5pct_60GWd_40y_Sinogram	65	136	1424	1.63132	0.975409	0.00111742				1_Areal	63	138	12.955	0.17046	-0.087385	33.01
										80	TN_24P_Full_5pct_60GWd_80y_Sinogram	65	136	1423.3	1.63052	0.97493	0.00111687				2_Areal	63	138	12.994	0.17098	0.056926	32.825
										-1	TN_24P_Full_5pct_Fresh_Sinogram	65	136	1459.9	1.67245	1	0.00114559		22.1058		3_Areal	63	138	13	0.17105	0.0932	32.903
																					4_Areal	63	138	12.985	0.17086	-0.016786	32.861
																					5_Areal	63	138	12.999	0.17104	0.0059767	32.947
																					6_Areal	63	138	13.029	0.17144	0.15376	33.059
																					7_Areal	63	138	12.969	0.17064	-0.15786	32.905
																					8_Areal	63	138	13.012	0.17122	-0.043792	33.028
																					9_Areal	63	138	12.98	0.17079	0.14089	32.917

## Sheet: FingerPrint
		scattering
								Stdev
	1	Fresh	64	136	1459.1	1.0253	0.00111758	22.6355
	2	14d	64	136	1423.1	1	0.00111758	0
	3	40y	64	136	1423.3	1.00014	0.00111758	0.125753
	4	80y	64	136	1422.6	0.999649	0.00111758	-0.314382
	5	14d_1Bundle_Fresh	64	136	1423	0.99993	0.00111758	-0.0628764
	6	14d_1Bundle_Missing	64	136	1379.8	0.969573	0.00111758	-27.2255
	7	14d_1Bundle_Steel	64	136	1375.7	0.966692	0.00111758	-29.8034
	8	14d_1Bundle_Pb	64	136	1432.8	1.00682	0.00111758	6.09901
	9	14d_1Bundle_DU	64	136	1425.9	1.00197	0.00111758	1.76054
		Scatter Delta	0.00115
		Transmission Delta	0.000368
	1	Fresh_Areal	19	96	12.924	0.999613	0.00036805	-1.05075
	2	60GWd_14d_Areal	19	96	12.929	1	0.00036805	0
	3	60GWd_40y_Areal	19	96	12.929	1	0.00036805	0
	4	60GWd_80y_Areal	19	96	12.926	0.999768	0.00036805	-0.630448
	5	14d_1Bundle_Fresh_Areal	19	96	12.926	0.999768	0.00036805	-0.630448
	6	14d_1Bundle_Missing_Areal	19	96	12.419	0.960554	0.00036805	-107.176
	7	14d_1Bundle_Steel_Areal	19	96	12.864	0.994973	0.00036805	-13.6597
	8	14d_1Bundle_Pb_Areal	19	96	12.943	1.00108	0.00036805	2.94209
	9	14d_1Bundle_DU_Areal	19	96	12.929	1	0.00036805	0

## Sheet: Missing-Steel
			-179.0000 179.0000 1 180
			-179.0000 179.0000 1 180
			-179.0000 179.0000 1 180
			-179.0000 179.0000 1 180
			-179.0000 179.0000 1 180
			-199	0	0	0	0	0
			-197	0	0	0	0	0
			-195	0	0	0	0	0
			-193	0	0	0	0	0
			-191	0	0	0	0	0
			-189	0	0	0	0	0
			-187	0	0	0	0	0
			-185	0	0	0	0	0
			-183	0	0	0	0	0
			-181	0	0	0	0	0
			-179	0	0	0	0	0
			-177	0	0	0	0	0
			-175	0	0	0	0	0
			-173	0	0	0	0	0
			-171	0	0	0	0	0
			-169	0.5	0.5	-3.643e-09	0.5	-1.656e-09
			-167	0.5002	0.5002	-5.831e-06	0.5002	-5.793e-06
			-165	0.5001	0.5001	-2.841e-06	0.5001	-2.87e-06
			-163	0.5001	0.5001	-2.203e-06	0.5001	-2.236e-06
			-161	0.5001	0.5001	-1.818e-06	0.5001	-1.806e-06
			-159	0.5	0.5	-1.628e-06	0.5	-1.65e-06
			-157	0.5	0.5	-1.418e-06	0.5	-1.438e-06
			-155	0.5	0.5	-1.367e-06	0.5	-1.357e-06
			-153	0.5	0.5	-1.295e-06	0.5	-1.245e-06
			-151	0.5	0.5	-1.207e-06	0.5	-1.208e-06
			-149	0.5	0.5	-1.133e-06	0.5	-1.13e-06
			-147	0.5	0.5	-1.063e-06	0.5	-1.089e-06
			-145	0.5	0.5	-9.99e-07	0.5	-1.013e-06
			-143	0.5	0.5	-9.613e-07	0.5	-9.775e-07
			-141	0.5	0.5	-9.497e-07	0.5	-9.331e-07
			-139	0.5	0.5	-8.871e-07	0.5	-8.788e-07
			-137	0.5	0.5	-8.553e-07	0.5	-8.553e-07
			-135	0.5	0.5	-8.722e-07	0.5	-8.596e-07
			-133	0.5	0.5	-8.699e-07	0.5	-8.384e-07
			-131	0.5	0.5	-8.222e-07	0.5	-8.278e-07
			-129	0.5	0.5	-7.613e-07	0.5	-8.033e-07
			-127	0.5	0.5	-7.623e-07	0.5	-8.04e-07
			-125	0.5	0.5	-7.679e-07	0.5	-7.768e-07
			-123	0.5	0.5	-6.904e-07	0.5	-6.874e-07
			-121	0.5	0.5	-7.192e-07	0.5	-7.153e-07
			-119	0.5	0.5	-7.133e-07	0.5	-6.864e-07
			-117	0.5	0.5	-6.937e-07	0.5	-6.845e-07
			-115	0.5	0.5	-6.268e-07	0.5	-6.328e-07
			-113	20.24	20.14	0.1056	20.13	-0.007587
			-111	17.96	18.01	-0.05294	17.96	-0.04946
			-109	18.77	18.85	-0.07709	18.82	-0.02627
			-107	19.59	19.5	0.09377	19.56	0.06521
			-105	20.17	20.21	-0.03765	20.2	-0.005709
			-103	20.28	20.28	-1.365e-05	20.33	0.05443
			-101	20.24	20.21	0.02607	20.27	0.05541
			-99	27.91	27.9	0.004654	27.84	-0.05914
			-97	38.3	38.61	-0.3107	38.33	-0.2825
			-95	40.22	40.15	0.07407	40.17	0.01714
			-93	40.36	40.5	-0.1406	40.4	-0.09304
			-91	41.09	41.3	-0.208	41.21	-0.08801
			-89	41.36	41.56	-0.2	41.61	0.0524
			-87	42.1	41.98	0.1202	41.88	-0.09693
			-85	42.3	42.43	-0.1264	42.5	0.06802
			-83	42.59	42.71	-0.1159	42.62	-0.08614
			-81	42.92	43.1	-0.1807	42.71	-0.3953
			-79	43.14	43.35	-0.2042	43.35	0.007863
			-77	43.8	43.88	-0.08102	43.7	-0.1835
			-75	46.6	47	-0.4059	46.57	-0.4327
			-73	47.02	47.94	-0.9201	46.91	-1.034
			-71	41.85	42.9	-1.05	42.19	-0.7042
			-69	41.4	40.76	0.6404	41.42	0.6581
			-67	43.44	40.56	2.875	43.88	3.314
			-65	44.93	40.43	4.504	44.86	4.428
			-63	45.99	40.22	5.772	46.03	5.81
			-61	47.06	39.97	7.091	46.9	6.929
			-59	47.75	39.41	8.34	47.92	8.509
			-57	49.43	39.09	10.35	49.3	10.21
			-55	50.96	38.77	12.19	50.97	12.2
			-53	52.96	38.71	14.25	52.91	14.2
			-51	55.18	38.51	16.67	55.22	16.71
			-49	55.87	38.25	17.62	55.54	17.29
			-47	56.21	38.25	17.96	56.15	17.9
			-45	57	38.01	19	56.92	18.92
			-43	58.06	37.76	20.29	58.21	20.45
			-41	59.07	37.15	21.91	59.28	22.13
			-39	60.01	36.94	23.07	59.64	22.7
			-37	61.09	37.2	23.89	60.98	23.78
			-35	61.04	36.97	24.07	60.98	24.01
			-33	61.75	36.53	25.22	61.38	24.84
			-31	62.07	36.39	25.68	61.62	25.23
			-29	62.11	36.56	25.55	62.08	25.52
			-27	62.54	36.14	26.4	62.3	26.16
			-25	61.75	36.21	25.54	61.86	25.65
			-23	61.28	36.06	25.22	61.3	25.23
			-21	60.86	35.93	24.93	61.78	25.85
			-19	61.46	35.95	25.5	63.26	27.31
			-17	61.36	35.84	25.53	63.79	27.95
			-15	62.16	35.76	26.39	63.89	28.13
			-13	61.72	35.51	26.21	63.95	28.43
			-11	62.39	35.76	26.63	64.19	28.43
			-9	62.02	35.39	26.63	64.02	28.63
			-7	62.45	35.39	27.06	64.23	28.84
			-5	62.27	35.32	26.95	64.12	28.8
			-3	61.68	35.4	26.28	63.97	28.57
			-1	61.51	35.35	26.15	63.23	27.88
			1	60.94	35.32	25.62	63.13	27.81
			3	61.61	35.41	26.2	64.11	28.7
			5	62.12	35.25	26.87	64.64	29.39
			7	61.76	35.58	26.18	64.46	28.87
			9	61.98	35.74	26.24	64.69	28.95
			11	61.76	35.39	26.38	64.41	29.02
			13	62.24	35.82	26.41	63.95	28.13
			15	62.37	35.59	26.78	64.51	28.92
			17	61.73	35.79	25.93	64.08	28.28
			19	61.18	35.92	25.26	63.42	27.51
			21	60.92	36.01	24.91	62.22	26.21
			23	60.74	35.99	24.75	61.64	25.65
			25	61.84	36.05	25.79	61.81	25.76
			27	62.28	36.35	25.92	62.24	25.89
			29	62.24	36.32	25.92	62.21	25.89
			31	62.47	36.39	26.08	61.9	25.51
			33	62.14	36.72	25.42	61.5	24.78
			35	61.1	36.9	24.2	60.98	24.08
			37	60.16	36.94	23.22	60.62	23.68
			39	59.93	37.25	22.68	59.49	22.23
			41	58.51	37.4	21.1	59.03	21.63
			43	58.39	37.63	20.76	58.44	20.81
			45	56.72	37.55	19.17	56.35	18.8
			47	55.6	37.8	17.8	55.67	17.87
			49	55.85	38.37	17.48	55.85	17.48
			51	55.38	38.32	17.06	55.05	16.73
			53	53.26	38.61	14.64	53	14.39
			55	51.19	38.94	12.25	51.22	12.28
			57	49.93	39.29	10.64	49.75	10.45
			59	48.62	39.66	8.964	48.55	8.895
			61	46.76	39.98	6.78	46.8	6.822
			63	45.22	40.26	4.959	45.5	5.241
			65	44.78	40.7	4.077	44.69	3.986
			67	43.65	40.64	3.004	43.44	2.798
			69	41.51	41.06	0.454	41.41	0.3559
			71	42.01	42.52	-0.5127	42.02	-0.5087
			73	46.72	47.75	-1.028	47.08	-0.6726
			75	46.51	46.68	-0.172	46.53	-0.1518
			77	44.12	44.34	-0.2142	43.81	-0.529
			79	42.96	43.22	-0.2632	43.12	-0.09953
			81	42.56	42.93	-0.3638	42.76	-0.1631
			83	42.57	42.69	-0.1179	42.7	0.01623
			85	42.36	42.3	0.05908	42.53	0.2295
			87	42.16	42.26	-0.09676	42.11	-0.1497
			89	41.65	41.55	0.09671	41.62	0.07263
			91	41.14	41.13	0.0123	41.28	0.1536
			93	40.63	40.5	0.126	40.79	0.2833
			95	40.09	39.85	0.239	40.02	0.1622
			97	38.45	38.46	-0.01084	38.54	0.08135
			99	27.82	27.79	0.02765	27.75	-0.04045
			101	20.21	20.23	-0.01733	20.22	-0.007646
			103	20.29	20.25	0.03928	20.24	-0.009887
			105	20.06	20.15	-0.08811	20.11	-0.04213
			107	19.69	19.65	0.04005	19.68	0.0288
			109	18.77	18.77	0.002077	18.76	-0.009823
			111	18.03	17.97	0.0593	18.01	0.03711
			113	20.1	20.15	-0.05047	20.13	-0.02102
			115	0.4817	0.4809	0.00076	0.4817	0.0007434
			117	0.5	0.5	-6.676e-07	0.5	-6.805e-07
			119	0.5	0.5	-6.768e-07	0.5	-6.798e-07
			121	0.5	0.5	-6.805e-07	0.5	-7.08e-07
			123	0.5	0.5	-7.398e-07	0.5	-7.414e-07
			125	0.5	0.5	-7.262e-07	0.5	-7.149e-07
			127	0.5	0.5	-7.461e-07	0.5	-7.523e-07
			129	0.5	0.5	-7.921e-07	0.5	-7.692e-07
			131	0.5	0.5	-8.01e-07	0.5	-8.262e-07
			133	0.5	0.5	-8.583e-07	0.5	-8.527e-07
			135	0.5	0.5	-8.679e-07	0.5	-8.427e-07
			137	0.5	0.5	-8.722e-07	0.5	-8.537e-07
			139	0.5	0.5	-8.616e-07	0.5	-8.742e-07
			141	0.5	0.5	-9.331e-07	0.5	-9.712e-07
			143	0.5	0.5	-9.58e-07	0.5	-9.553e-07
			145	0.5	0.5	-1.032e-06	0.5	-1.023e-06
			147	0.5	0.5	-1.06e-06	0.5	-1.033e-06
			149	0.5	0.5	-1.102e-06	0.5	-1.12e-06
			151	0.5	0.5	-1.152e-06	0.5	-1.161e-06
			153	0.5	0.5	-1.225e-06	0.5	-1.234e-06
			155	0.5	0.5	-1.357e-06	0.5	-1.349e-06
			157	0.5	0.5	-1.523e-06	0.5	-1.491e-06
			159	0.5	0.5	-1.563e-06	0.5	-1.569e-06
			161	0.5001	0.5001	-1.828e-06	0.5001	-1.838e-06
			163	0.5001	0.5001	-2.173e-06	0.5001	-2.187e-06
			165	0.5001	0.5001	-2.847e-06	0.5001	-2.826e-06
			167	0.5002	0.5002	-5.834e-06	0.5002	-5.859e-06
			169	0.5	0.5	-1.192e-08	0.5	-1.192e-08
			171	0	0	0	0	0
			173	0	0	0	0	0
			175	0	0	0	0	0
			177	0	0	0	0	0
			179	0	0	0	0	0
			181	0	0	0	0	0
			183	0	0	0	0	0
			185	0	0	0	0	0
			187	0	0	0	0	0
			189	0	0	0	0	0
			191	0	0	0	0	0
			193	0	0	0	0	0
			195	0	0	0	0	0
			197	0	0	0	0	0
			199	0	0	0	0	0

## Sheet: Sheet3
					0.00152958	0.00159729	0.00150251	0.00160933	0.0015768	0.0015582	0.00157702	0.00161143	0.00152226	0.00162802	0.00157784	0.00153051	0.00154762	0.00159967	0.00162211	0.0015057	0.00162821	0.00156755	0.00151946	0.0016246	0.0016547	0.00151004	0.00160349	0.00150914
	TN_24P_5pct_60GWd_14d_1Bundle_DU	linear	fit	basketrho:	0.00153598	0.0015989	0.00149117	0.00160772	0.00161112	0.00151316	0.00156263	0.00161529	0.00157208	0.00153332	0.00159642	0.00153573	0.00154101	0.0016176	0.00155614	0.00154167	0.00162458	0.00156131	0.00145767	0.00164551	0.00164504	0.00150851	0.00159225	0.00151875
	TN_24P_5pct_60GWd_14d_1Bundle_Fresh	linear	fit	basketrho:	0.00152482	0.00160193	0.0015009	0.00160664	0.00161374	0.00149758	0.00158145	0.00162678	0.00156583	0.00155213	0.00160242	0.00152278	0.00153493	0.00162534	0.00155819	0.00154023	0.00163101	0.00157171	0.00145891	0.00163793	0.00163833	0.00151082	0.00159934	0.00151658
	TN_24P_5pct_60GWd_14d_1Bundle_Missing	linear	fit	basketrho:	0.00153456	0.00159784	0.00148541	0.001477	0.00157885	0.00150233	0.00159445	0.00149915	-1.92073e-05	0.00144225	0.00161321	0.00153671	0.0015569	0.0016001	0.00144154	0.00150244	0.00163635	0.00155338	0.00145471	0.00165318	0.00164614	0.00149556	0.00159625	0.00152164
	TN_24P_5pct_60GWd_14d_1Bundle_Pb	linear	fit	basketrho:	0.00152365	0.00159894	0.00150413	0.00160904	0.00161834	0.00148994	0.00156773	0.00161433	0.00162171	0.00155039	0.00159722	0.00153757	0.00153063	0.00163203	0.0015718	0.00151841	0.00163508	0.00155133	0.00145697	0.00162907	0.00164671	0.00149844	0.00159851	0.00151815
	TN_24P_5pct_60GWd_14d_1Bundle_Steel	linear	fit	basketrho:	0.00154301	0.00160506	0.00149213	0.00158436	0.00159553	0.00150787	0.00155822	0.00160679	0.00131116	0.00155702	0.00159437	0.00153593	0.0015575	0.0016155	0.00155493	0.00152267	0.00162434	0.00156889	0.00144722	0.00165228	0.00165068	0.00150549	0.00160892	0.00150868
	TN_24P_Full_5pct_60GWd_14d	linear	fit	basketrho:	0.00152576	0.00158724	0.00149288	0.00159627	0.0015937	0.0014909	0.00157046	0.00161372	0.00155033	0.00155706	0.00159703	0.00152728	0.00155381	0.00162224	0.00154146	0.00152954	0.0016212	0.00157385	0.00144909	0.00165341	0.00164692	0.00150608	0.00159062	0.00150463
	TN_24P_Full_5pct_60GWd_20y	linear	fit	basketrho:	0.00153612	0.0015984	0.00150415	0.00160074	0.00160225	0.00150867	0.00156981	0.00161043	0.00154915	0.00157459	0.00160486	0.00152766	0.00154339	0.00162292	0.00156169	0.00152408	0.00162653	0.00156378	0.00147086	0.00163692	0.00165778	0.00149968	0.00160931	0.00150534
	TN_24P_Full_5pct_60GWd_40y	linear	fit	basketrho:	0.00153403	0.00160094	0.001514	0.00162547	0.00150524	0.00174108	0.00159139	0.00162615	0.00146273	0.00182485	0.0015182	0.001542	0.00154888	0.00152819	0.00181626	0.00144444	0.00163299	0.0015713	0.00170252	0.00157108	0.00166279	0.00153402	0.0016028	0.00151991
	TN_24P_Full_5pct_60GWd_80y	linear	fit	basketrho:	0.00152243	0.00160259	0.00149901	0.00161482	0.00160602	0.00149215	0.00157642	0.00159543	0.00152682	0.00155561	0.00159127	0.0015251	0.00154438	0.00162534	0.00156902	0.00152476	0.00163212	0.00156127	0.00145538	0.001637	0.00165129	0.00150039	0.00161124	0.00150668
	TN_24P_Full_5pct_Fresh	linear	fit	basketrho:	0.00153194	0.00159695	0.00149666	0.00160428	0.00160112	0.00151107	0.0015846	0.00160902	0.00155614	0.00157066	0.00159396	0.00153084	0.00154848	0.00162145	0.0015592	0.00152737	0.00162897	0.00157294	0.00146094	0.00164725	0.00166188	0.00151152	0.00160744	0.00150043
	TN_24P_Empty	linear	fit	basketrho:	-7.71476e-05	-2.85517e-05	-0.000125206	-0.000200587	-0.00021021	-0.000142638	-5.78664e-05	-0.000213353	-0.000165638	-0.000245708	-0.000226523	-5.22168e-05	-4.82239e-05	-0.000208239	-0.000224858	-0.000254838	-0.000214202	-6.49765e-05	-0.000169253	-0.000207831	-0.000192023	-0.000133588	-3.96469e-05	-7.11398e-05
	TN_24P_5pct_60GWd_14d_1Bundle_DU				0.00418221	6.93141e-05	-3.84192e-05	7.81359e-05	8.15343e-05	-1.64239e-05	3.3045e-05	8.57053e-05	4.24942e-05	3.73743e-06	6.68364e-05	6.14814e-06	1.14272e-05	8.80112e-05	2.65597e-05	1.2081e-05	9.49999e-05	3.17211e-05	-7.19161e-05	0.000115921	0.000115457	-2.10774e-05	6.26668e-05	-1.08376e-05
	TN_24P_5pct_60GWd_14d_1Bundle_Fresh				-0.00311211	7.23414e-05	-2.86838e-05	7.70577e-05	8.41541e-05	-3.20069e-05	5.18675e-05	9.7194e-05	3.6247e-05	2.25476e-05	7.28393e-05	-6.80549e-06	5.34104e-06	9.57555e-05	2.86098e-05	1.06461e-05	0.000101422	4.21226e-05	-7.0677e-05	0.000108348	0.000108741	-1.87683e-05	6.97568e-05	-1.30027e-05
	TN_24P_5pct_60GWd_14d_1Bundle_Missing				0.00325398	6.82529e-05	-4.41791e-05	-5.25873e-05	4.92619e-05	-2.72577e-05	6.48697e-05	-3.04367e-05	-0.00154879	-8.7339e-05	8.36295e-05	7.12158e-06	2.73109e-05	7.05177e-05	-8.80488e-05	-2.71413e-05	0.000106765	2.37927e-05	-7.48795e-05	0.000123594	0.000116558	-3.40244e-05	6.66646e-05	-7.94294e-06
	TN_24P_5pct_60GWd_14d_1Bundle_Pb				-0.00388294	6.93508e-05	-2.54569e-05	7.94521e-05	8.87596e-05	-3.96471e-05	3.81503e-05	8.47405e-05	9.21249e-05	2.08071e-05	6.76323e-05	7.98745e-06	1.04857e-06	0.000102443	4.22202e-05	-1.11778e-05	0.000105494	2.17437e-05	-7.26099e-05	9.94805e-05	0.000117129	-3.11428e-05	6.89282e-05	-1.14326e-05
	TN_24P_5pct_60GWd_14d_1Bundle_Steel				0.00877658	7.54735e-05	-3.74543e-05	5.47705e-05	6.5944e-05	-2.17132e-05	2.8631e-05	7.72015e-05	-0.000218425	2.74342e-05	6.47896e-05	6.34275e-06	2.79177e-05	8.59133e-05	2.53438e-05	-6.91574e-06	9.47602e-05	3.93009e-05	-8.23686e-05	0.000122691	0.000121094	-2.4096e-05	7.93398e-05	-2.09021e-05
	TN_24P_Full_5pct_60GWd_14d				-0.00250312	5.76571e-05	-3.67042e-05	6.66835e-05	6.41142e-05	-3.86821e-05	4.08718e-05	8.41368e-05	2.0744e-05	2.74725e-05	6.74427e-05	-2.29972e-06	2.42259e-05	9.2652e-05	1.18726e-05	-4.9655e-08	9.16106e-05	4.42702e-05	-8.04975e-05	0.000123821	0.000117336	-2.35045e-05	6.10368e-05	-2.49538e-05
	TN_24P_Full_5pct_60GWd_20y				0.00427425	6.88133e-05	-2.54307e-05	7.1157e-05	7.26661e-05	-2.09111e-05	4.02209e-05	8.08456e-05	1.95653e-05	4.50008e-05	7.52773e-05	-1.92701e-06	1.38085e-05	9.33308e-05	3.21032e-05	-5.50593e-06	9.69478e-05	3.41951e-05	-5.87224e-05	0.00010734	0.000128192	-2.99077e-05	7.97267e-05	-2.42453e-05
	TN_24P_Full_5pct_60GWd_40y				0.00290625	7.13533e-05	-1.55808e-05	9.58889e-05	-2.43422e-05	0.000211499	6.18019e-05	9.65657e-05	-6.68553e-05	0.000295261	-1.13831e-05	1.24148e-05	1.92968e-05	-1.39471e-06	0.000286673	-8.51471e-05	0.000103406	4.17186e-05	0.000172931	4.14987e-05	0.000133207	4.43688e-06	7.3214e-05	-9.66992e-06
	TN_24P_Full_5pct_60GWd_80y				-0.00467737	7.30087e-05	-3.05783e-05	8.52334e-05	7.64368e-05	-3.74344e-05	4.68356e-05	6.58477e-05	-2.76602e-06	2.60217e-05	6.16842e-05	-4.48107e-06	1.47942e-05	9.57505e-05	3.9438e-05	-4.82538e-06	0.000102537	3.16842e-05	-7.42068e-05	0.000107419	0.000121708	-2.91899e-05	8.16603e-05	-2.29024e-05
	TN_24P_Full_5pct_Fresh				0.00153976	6.7366e-05	-3.2926e-05	7.46978e-05	7.15391e-05	-1.8515e-05	5.50143e-05	7.94403e-05	2.6558e-05	4.10714e-05	6.43796e-05	1.25975e-06	1.88946e-05	9.18676e-05	2.96126e-05	-2.21696e-06	9.93903e-05	4.33517e-05	-6.86432e-05	0.000117662	0.000132296	-1.80676e-05	7.78531e-05	-2.91561e-05

## Sheet: Transmission
				0.00152854	0.00159693	0.00150064	0.00161021	0.00157652	0.0015588	0.00158072	0.00161108	0.001524	0.00162704	0.00157512	0.00153131	0.00154889	0.0015993	0.00162148	0.00150652	0.00162882	0.00156984	0.00151698	0.00162718	0.00165572	0.001513	0.00160303	0.00150791
				0.00351862	0.00430819	0.00617167	0.00788595	0.0303128	0.0781828	0.00580558	0.00787714	0.0280657	0.0811558	0.0241351	0.00490431	0.002493	0.0296621	0.0803889	0.0275054	0.00329586	0.00370181	0.0815994	0.0233581	0.00474273	0.00973532	0.00559052	0.00557936
TN_24P_5pct_60GWd_14d_1Bundle_DU	linear	fit	basketrho:	0.00153598	0.0015989	0.00149117	0.00160772	0.00161112	0.00151316	0.00156263	0.00161529	0.00157208	0.00153332	0.00159642	0.00153573	0.00154101	0.0016176	0.00155614	0.00154167	0.00162458	0.00156131	0.00145767	0.00164551	0.00164504	0.00150851	0.00159225	0.00151875
TN_24P_5pct_60GWd_14d_1Bundle_Fresh	linear	fit	basketrho:	0.00152482	0.00160193	0.0015009	0.00160664	0.00161374	0.00149758	0.00158145	0.00162678	0.00156583	0.00155213	0.00160242	0.00152278	0.00153493	0.00162534	0.00155819	0.00154023	0.00163101	0.00157171	0.00145891	0.00163793	0.00163833	0.00151082	0.00159934	0.00151658
TN_24P_5pct_60GWd_14d_1Bundle_Missing	linear	fit	basketrho:	0.00153456	0.00159784	0.00148541	0.001477	0.00157885	0.00150233	0.00159445	0.00149915	-1.92073e-05	0.00144225	0.00161321	0.00153671	0.0015569	0.0016001	0.00144154	0.00150244	0.00163635	0.00155338	0.00145471	0.00165318	0.00164614	0.00149556	0.00159625	0.00152164
TN_24P_5pct_60GWd_14d_1Bundle_Pb	linear	fit	basketrho:	0.00152365	0.00159894	0.00150413	0.00160904	0.00161834	0.00148994	0.00156773	0.00161433	0.00162171	0.00155039	0.00159722	0.00153757	0.00153063	0.00163203	0.0015718	0.00151841	0.00163508	0.00155133	0.00145697	0.00162907	0.00164671	0.00149844	0.00159851	0.00151815
TN_24P_5pct_60GWd_14d_1Bundle_Steel	linear	fit	basketrho:	0.00154301	0.00160506	0.00149213	0.00158436	0.00159553	0.00150787	0.00155822	0.00160679	0.00131116	0.00155702	0.00159437	0.00153593	0.0015575	0.0016155	0.00155493	0.00152267	0.00162434	0.00156889	0.00144722	0.00165228	0.00165068	0.00150549	0.00160892	0.00150868
TN_24P_Full_5pct_60GWd_14d	linear	fit	basketrho:	0.00152576	0.00158724	0.00149288	0.00159627	0.0015937	0.0014909	0.00157046	0.00161372	0.00155033	0.00155706	0.00159703	0.00152728	0.00155381	0.00162224	0.00154146	0.00152954	0.0016212	0.00157385	0.00144909	0.00165341	0.00164692	0.00150608	0.00159062	0.00150463
TN_24P_Full_5pct_60GWd_40y	linear	fit	basketrho:	0.00153403	0.00160094	0.001514	0.00162547	0.00150524	0.00174108	0.00159139	0.00162615	0.00146273	0.00182485	0.0015182	0.001542	0.00154888	0.00152819	0.00181626	0.00144444	0.00163299	0.0015713	0.00170252	0.00157108	0.00166279	0.00153402	0.0016028	0.00151991
TN_24P_Full_5pct_60GWd_80y	linear	fit	basketrho:	0.00152243	0.00160259	0.00149901	0.00161482	0.00160602	0.00149215	0.00157642	0.00159543	0.00152682	0.00155561	0.00159127	0.0015251	0.00154438	0.00162534	0.00156902	0.00152476	0.00163212	0.00156127	0.00145538	0.001637	0.00165129	0.00150039	0.00161124	0.00150668
TN_24P_Full_5pct_Fresh	linear	fit	basketrho:	0.00153194	0.00159695	0.00149666	0.00160428	0.00160112	0.00151107	0.0015846	0.00160902	0.00155614	0.00157066	0.00159396	0.00153084	0.00154848	0.00162145	0.0015592	0.00152737	0.00162897	0.00157294	0.00146094	0.00164725	0.00166188	0.00151152	0.00160744	0.00150043
TN_24P_Empty	linear	fit	basketrho:	-7.71476e-05	-2.85517e-05	-0.000125206	-0.000200587	-0.00021021	-0.000142638	-5.78664e-05	-0.000213353	-0.000165638	-0.000245708	-0.000226523	-5.22168e-05	-4.82239e-05	-0.000208239	-0.000224858	-0.000254838	-0.000214202	-6.49765e-05	-0.000169253	-0.000207831	-0.000192023	-0.000133588	-3.96469e-05	-7.11398e-05
					0.0258101
TN_24P_5pct_60GWd_14d_1Bundle_Fresh				-0.00243015	0.00312794	0.0001756	-0.00221595	0.0236071	-0.0392762	0.00046602	0.00974278	0.0274454	-0.0460401	0.0173374	-0.00556969	-0.00901409	0.01628	-0.0390317	0.0223732	0.00134209	0.00118889	-0.0382819	0.006605	-0.0105068	-0.00144547	-0.00229828	0.00574825
TN_24P_5pct_60GWd_14d_1Bundle_Missing				0.00394029	0.000567752	-0.0101502	-0.0827303	0.00147471	-0.0362295	0.0086915	-0.0694777	-1.0126	-0.113578	0.0241878	0.00352518	0.0051702	0.000499533	-0.110977	-0.00270926	0.00462225	-0.0104874	-0.0410522	0.0159748	-0.00578511	-0.0115288	-0.00422727	0.00910371
TN_24P_5pct_60GWd_14d_1Bundle_Pb				-0.0032015	0.00125521	0.00232594	-0.000728974	0.0265285	-0.0441776	-0.00821186	0.00201284	0.0641105	-0.0471098	0.0140317	0.00409063	-0.0117854	0.0204618	-0.0306379	0.00788698	0.00384173	-0.0117926	-0.0395561	0.00115552	-0.0054405	-0.00962422	-0.00281516	0.00678949
TN_24P_5pct_60GWd_14d_1Bundle_Steel				0.00946668	0.00508931	-0.00566889	-0.0160572	0.0120563	-0.0326727	-0.014234	-0.00266661	-0.139662	-0.0430367	0.0122269	0.00301658	0.00556193	0.0101259	-0.0410459	0.0107161	-0.0027479	-0.000608523	-0.045989	0.0154195	-0.00304561	-0.00496673	0.00367976	0.000509589
												Signal	Dsignal	SD
											Fresh	0.0274454	0.0258101	1.06336
											Missing	1.0126	0.0258101	39.2328
											Pb	0.0641105	0.0258101	2.48393
											Steel	0.139662	0.0258101	5.41112

## Sheet: Scatter
				0.292997	0.299733	0.331493	0.28355	0.281008	0.333751	0.304222	0.28078	0.260977	0.26995	0.276914	0.290711	0.291886	0.279451	0.264511	0.265982	0.285063	0.298032	0.338564	0.27806	0.281876	0.33405	0.299719	0.295071
				0.0105464	0.0213905	0.0115566	0.0150397	0.0143799	0.0150064	0.0126099	0.0166011	0.0287712	0.00853015	0.0121796	0.0215518	0.015951	0.0269004	0.00920049	0.0165047	0.0215369	0.0143658	0.0144412	0.0159529	0.0212979	0.0207181	0.0164427	0.0184129
TN_24P_5pct_60GWd_14d_1Bundle_DU	linear	fit	basketrho:	0.29022	0.301091	0.327831	0.275646	0.279653	0.329046	0.299467	0.275137	0.259229	0.267422	0.274224	0.292873	0.284161	0.273821	0.273244	0.265074	0.27696	0.293793	0.328493	0.273978	0.28056	0.332126	0.294456	0.288123
TN_24P_5pct_60GWd_14d_1Bundle_Fresh	linear	fit	basketrho:	0.29017	0.29746	0.327572	0.285666	0.286925	0.335962	0.297721	0.27649	0.258715	0.272347	0.269701	0.295222	0.292005	0.283142	0.257826	0.269052	0.282831	0.294789	0.339814	0.27334	0.278024	0.329622	0.292366	0.289281
TN_24P_5pct_60GWd_14d_1Bundle_Missing	linear	fit	basketrho:	0.292514	0.302323	0.33567	0.277475	0.287045	0.333208	0.30062	0.277889	0.259925	0.284569	0.277659	0.290833	0.290749	0.273774	0.284617	0.0256529	0.299666	0.296413	0.338294	0.271551	0.299033	0.336751	0.299879	0.297182
TN_24P_5pct_60GWd_14d_1Bundle_Pb	linear	fit	basketrho:	0.292379	0.29681	0.33682	0.281927	0.282945	0.334888	0.305161	0.273744	0.263709	0.266269	0.276593	0.289483	0.288539	0.277739	0.27434	0.309658	0.280126	0.29615	0.333945	0.275292	0.273173	0.337559	0.300126	0.296196
TN_24P_5pct_60GWd_14d_1Bundle_Steel	linear	fit	basketrho:	0.289702	0.297768	0.32887	0.277529	0.284538	0.337266	0.297277	0.276877	0.259346	0.268273	0.275146	0.283992	0.285785	0.281463	0.26954	0.0725269	0.282786	0.301459	0.329486	0.274249	0.286138	0.329935	0.296624	0.289422
TN_24P_Full_5pct_60GWd_14d	linear	fit	basketrho:	0.290627	0.29792	0.331219	0.281789	0.279819	0.331233	0.298591	0.281997	0.257645	0.267165	0.27384	0.290384	0.286095	0.272535	0.263085	0.271738	0.27833	0.292569	0.336232	0.275575	0.277369	0.334722	0.298157	0.289785
TN_24P_Full_5pct_60GWd_40y	linear	fit	basketrho:	0.292416	0.297531	0.332145	0.28494	0.283938	0.330706	0.307204	0.282373	0.262463	0.269379	0.277182	0.286251	0.29319	0.28159	0.262475	0.265613	0.282955	0.302765	0.33407	0.281873	0.285986	0.334085	0.297099	0.292876
TN_24P_Full_5pct_60GWd_80y	linear	fit	basketrho:	0.291445	0.294421	0.326643	0.278763	0.284467	0.331834	0.305426	0.274026	0.253122	0.270579	0.275103	0.286536	0.290991	0.274569	0.264569	0.261048	0.286004	0.299512	0.338605	0.27307	0.276124	0.32524	0.296575	0.295081
TN_24P_Full_5pct_Fresh	linear	fit	basketrho:	0.2975	0.309059	0.335966	0.288708	0.27581	0.341232	0.305669	0.284722	0.270679	0.272675	0.281532	0.299674	0.29727	0.28911	0.267915	0.265529	0.292964	0.297282	0.345352	0.281723	0.288026	0.342151	0.307045	0.302541
TN_24P_Empty	linear	fit	basketrho:	0.0287726	0.0306443	0.0392971	0.015764	0.015489	0.0376391	0.0325881	0.0121139	-0.00666829	-0.00119442	0.0140081	0.0273149	0.0308804	0.0106533	-0.002646	0.000941385	0.0155821	0.0308751	0.0384867	0.0133289	0.0127953	0.0385949	0.0302289	0.0268697
					0.0149985
TN_24P_5pct_60GWd_14d_1Bundle_Fresh				-0.00964795	-0.00758124	-0.0118307	0.00746383	0.0210539	0.00662446	-0.0213702	-0.0152793	-0.00866699	0.00887967	-0.0260495	0.0155141	0.000406984	0.0132084	-0.0252715	0.0115446	-0.00783312	-0.0108817	0.00369125	-0.0169752	-0.013667	-0.0132552	-0.0245337	-0.0196213
TN_24P_5pct_60GWd_14d_1Bundle_Missing				-0.00164652	0.00864286	0.0126004	-0.0214252	0.021482	-0.00162945	-0.0118399	-0.0102962	-0.00402972		0.0026915	0.000417418	-0.00389688	-0.0203175		-0.903554		-0.00543094	-0.000798365	-0.0234079	0.0608676	0.00808751	0.00053468	0.00715611
TN_24P_5pct_60GWd_14d_1Bundle_Pb				-0.00210907	-0.00975238	0.0160669	-0.00572485	0.00689029	0.0034042	0.00308421	-0.0250591	0.0104666	-0.0136332	-0.00115812	-0.00422549	-0.011468	-0.00612845	0.0371577	0.164206	-0.0173195	-0.00631365	-0.0136432	-0.00995567	-0.0308756	0.0105072	0.001359	0.0038126
TN_24P_5pct_60GWd_14d_1Bundle_Steel				-0.0112441	-0.00655343	-0.00791559	-0.021233	0.0125604	0.0105299	-0.0228298	-0.0138977	-0.00624904	-0.00621185	-0.00638346	-0.0231138	-0.0209048	0.00719924	0.0190133	-0.727324	-0.00798892	0.011498	-0.0268149	-0.0137065	0.0151212	-0.0123186	-0.0103262	-0.019142
																			Scatter			Transmission
																			Signal	DSignal	SD	Signal	DSignal	SD
																		Fresh	0.025	0.0149985	1.66683	0.0274454	0.0258101	1.06336
																		Missing	0.903554	0.0149985	60.2429	1.0126	0.0258101	39.2328
																		Pb	0.164206	0.0149985	10.9482	0.0641105	0.0258101	2.48393
																		Steel	0.727324	0.0149985	48.4931	0.139662	0.0258101	5.41112
TN_24P_5pct_60GWd_14d_1Bundle_DU	linear	fit	basketrho:	0.29022	0.301091	0.327831	0.275646	0.279653	0.329046	0.299467	0.275137	0.259229	0.267422	0.274224	0.292873	0.284161	0.273821	0.273244	0.265074	0.27696	0.293793	0.328493	0.273978	0.28056	0.332126	0.294456	0.288123
TN_24P_5pct_60GWd_14d_1Bundle_Fresh	linear	fit	basketrho:	0.29017	0.29746	0.327572	0.285666	0.286925	0.335962	0.297721	0.27649	0.258715	0.272347	0.269701	0.295222	0.292005	0.283142	0.257826	0.269052	0.282831	0.294789	0.339814	0.27334	0.278024	0.329622	0.292366	0.289281
TN_24P_5pct_60GWd_14d_1Bundle_Missing	linear	fit	basketrho:	0.292514	0.302323	0.33567	0.277475	0.287045	0.333208	0.30062	0.277889	0.259925	0.284569	0.277659	0.290833	0.290749	0.273774	0.284617	0.0256529	0.299666	0.296413	0.338294	0.271551	0.299033	0.336751	0.299879	0.297182
TN_24P_5pct_60GWd_14d_1Bundle_Pb	linear	fit	basketrho:	0.292379	0.29681	0.33682	0.281927	0.282945	0.334888	0.305161	0.273744	0.263709	0.266269	0.276593	0.289483	0.288539	0.277739	0.27434	0.309658	0.280126	0.29615	0.333945	0.275292	0.273173	0.337559	0.300126	0.296196
TN_24P_5pct_60GWd_14d_1Bundle_Steel	linear	fit	basketrho:	0.289702	0.297768	0.32887	0.277529	0.284538	0.337266	0.297277	0.276877	0.259346	0.268273	0.275146	0.283992	0.285785	0.281463	0.26954	0.0725269	0.282786	0.301459	0.329486	0.274249	0.286138	0.329935	0.296624	0.289422
TN_24P_Full_5pct_60GWd_14d	linear	fit	basketrho:	0.290627	0.29792	0.331219	0.281789	0.279819	0.331233	0.298591	0.281997	0.257645	0.267165	0.27384	0.290384	0.286095	0.272535	0.263085	0.271738	0.27833	0.292569	0.336232	0.275575	0.277369	0.334722	0.298157	0.289785
TN_24P_Full_5pct_60GWd_40y	linear	fit	basketrho:	0.292416	0.297531	0.332145	0.28494	0.283938	0.330706	0.307204	0.282373	0.262463	0.269379	0.277182	0.286251	0.29319	0.28159	0.262475	0.265613	0.282955	0.302765	0.33407	0.281873	0.285986	0.334085	0.297099	0.292876
TN_24P_Full_5pct_60GWd_80y	linear	fit	basketrho:	0.291445	0.294421	0.326643	0.278763	0.284467	0.331834	0.305426	0.274026	0.253122	0.270579	0.275103	0.286536	0.290991	0.274569	0.264569	0.261048	0.286004	0.299512	0.338605	0.27307	0.276124	0.32524	0.296575	0.295081
TN_24P_Full_5pct_Fresh	linear	fit	basketrho:	0.2975	0.309059	0.335966	0.288708	0.27581	0.341232	0.305669	0.284722	0.270679	0.272675	0.281532	0.299674	0.29727	0.28911	0.267915	0.265529	0.292964	0.297282	0.345352	0.281723	0.288026	0.342151	0.307045	0.302541
TN_24P_Empty	linear	fit	basketrho:	0.0287726	0.0306443	0.0392971	0.015764	0.015489	0.0376391	0.0325881	0.0121139	-0.00666829	-0.00119442	0.0140081	0.0273149	0.0308804	0.0106533	-0.002646	0.000941385	0.0155821	0.0308751	0.0384867	0.0133289	0.0127953	0.0385949	0.0302289	0.0268697
	linear	fit	caskrgo,rhocask2:	0.401506	0.0596079
	linear	fit	caskrgo,rhocask2:	0.401725	0.0579151
	linear	fit	caskrgo,rhocask2:	0.401404	0.057268
	linear	fit	caskrgo,rhocask2:	0.402338	0.0566688
	linear	fit	caskrgo,rhocask2:	0.401685	0.0583641
	linear	fit	caskrgo,rhocask2:	0.401817	0.058443
	linear	fit	caskrgo,rhocask2:	0.402011	0.0564222
	linear	fit	caskrgo,rhocask2:	0.401712	0.0585448
	linear	fit	caskrgo,rhocask2:	0.402008	0.0570776
	linear	fit	caskrgo,rhocask2:	0.403327	0.0832035
	umin	fitbasketrho:	0.0305435	0.0323469	0.0411354	0.015959	0.0165269	0.0395901	0.0343647	0.0122542	0	0	0.0152754	0.0290063	0.0325993	0.0114007	0	0.00149455	0.0169946	0.0325619	0.0404075	0.014312	0.0141474	0.0405672	0.0319414	0.0285579
	umin	fitbasketrho:	0.289702	0.297768	0.32887	0.277529	0.284538	0.337266	0.297277	0.276877	0.259346	0.268273	0.275146	0.283992	0.285785	0.281463	0.26954	0.0725269	0.282786	0.301459	0.329486	0.274249	0.286138	0.329935	0.296624	0.289422
	umin	fitbasketrho:	0.29017	0.29746	0.327572	0.285666	0.286925	0.335962	0.297721	0.27649	0.258715	0.272347	0.269701	0.295222	0.292005	0.283142	0.257826	0.269052	0.282831	0.294789	0.339814	0.27334	0.278024	0.329622	0.292366	0.289281
	umin	fitbasketrho:	0.29022	0.301091	0.327831	0.275646	0.279653	0.329046	0.299467	0.275137	0.259229	0.267422	0.274224	0.292873	0.284161	0.273821	0.273244	0.265074	0.27696	0.293793	0.328493	0.273978	0.28056	0.332126	0.294456	0.288123
	umin	fitbasketrho:	0.290627	0.29792	0.331219	0.281789	0.279819	0.331233	0.298591	0.281997	0.257645	0.267165	0.27384	0.290384	0.286095	0.272535	0.263085	0.271738	0.27833	0.292569	0.336232	0.275575	0.277369	0.334722	0.298157	0.289785
	umin	fitbasketrho:	0.291445	0.294421	0.326643	0.278763	0.284467	0.331834	0.305426	0.274026	0.253122	0.270579	0.275103	0.286536	0.290991	0.274569	0.264569	0.261048	0.286004	0.299512	0.338605	0.27307	0.276124	0.32524	0.296575	0.295081
	umin	fitbasketrho:	0.292379	0.29681	0.33682	0.281927	0.282945	0.334888	0.305161	0.273744	0.263709	0.266269	0.276593	0.289483	0.288539	0.277739	0.27434	0.309658	0.280126	0.29615	0.333945	0.275292	0.273173	0.337559	0.300126	0.296196
	umin	fitbasketrho:	0.292416	0.297531	0.332145	0.28494	0.283938	0.330706	0.307204	0.282373	0.262463	0.269379	0.277182	0.286251	0.29319	0.28159	0.262475	0.265613	0.282955	0.302765	0.33407	0.281873	0.285986	0.334085	0.297099	0.292876
	umin	fitbasketrho:	0.292514	0.302323	0.33567	0.277475	0.287045	0.333208	0.30062	0.277889	0.259925	0.284569	0.277659	0.290833	0.290749	0.273774	0.284617	0.0256529	0.299666	0.296413	0.338294	0.271551	0.299033	0.336751	0.299879	0.297182
	umin	fitbasketrho:	0.2975	0.309059	0.335966	0.288708	0.27581	0.341232	0.305669	0.284722	0.270679	0.272675	0.281532	0.299674	0.29727	0.28911	0.267915	0.265529	0.292964	0.297282	0.345352	0.281723	0.288026	0.342151	0.307045	0.302541
	umin	fit	caskrgo,rhocask2:	0.401506	0.0596079
	umin	fit	caskrgo,rhocask2:	0.401725	0.0579151
	umin	fit	caskrgo,rhocask2:	0.401404	0.057268
	umin	fit	caskrgo,rhocask2:	0.402338	0.0566688
	umin	fit	caskrgo,rhocask2:	0.401685	0.0583641
	umin	fit	caskrgo,rhocask2:	0.401817	0.058443
	umin	fit	caskrgo,rhocask2:	0.402011	0.0564222
	umin	fit	caskrgo,rhocask2:	0.401712	0.0585448
	umin	fit	caskrgo,rhocask2:	0.402008	0.0570776
	umin	fit	caskrgo,rhocask2:	0.403472	0.0818697

## Sheet: exosure
				R	170
				h	100
				z0	25
											muons/360deg/cm
									muons/cm^2/min
				-100	0.12751	0.57004	0.00205634	0.157172	0.155116		450000	integrated over angle in a 1 cm wide strip
									12.4233		36222.1	minutes	25.1543	days
					z1	z2	t1	t1	mouns(/2 cm/min)
				-50	125	125	0.57004	0.57004	0
				-48	121	125	0.555366	0.57004	0.0139401
				-46	117	125	0.54042	0.57004	0.0274012
				-44	113	125	0.5252	0.57004	0.0403639
				-42	109	125	0.509707	0.57004	0.0528098
				-40	105	125	0.493941	0.57004	0.0647216
				-38	101	125	0.477903	0.57004	0.0760834
				-36	97	125	0.461594	0.57004	0.0868809
				-34	93	125	0.445016	0.57004	0.0971017
				-32	89	125	0.428172	0.57004	0.106735
				-30	85	125	0.411065	0.57004	0.115773
				-28	81	125	0.393698	0.57004	0.12421
				-26	77	125	0.376078	0.57004	0.132042
				-24	73	125	0.358209	0.57004	0.139269
				-22	69	125	0.340097	0.57004	0.145895
				-20	65	125	0.321751	0.57004	0.151924
				-18	61	125	0.303177	0.57004	0.157366
				-16	57	125	0.284385	0.57004	0.162233
				-14	53	125	0.265384	0.57004	0.166542
				-12	49	125	0.246185	0.57004	0.170312
				-10	45	125	0.226799	0.57004	0.173566
				-8	41	125	0.207238	0.57004	0.176332
				-6	37	125	0.187514	0.57004	0.178639
				-4	33	125	0.167642	0.57004	0.180521
				-2	29	125	0.147636	0.57004	0.182015
				0	25	125	0.12751	0.57004	0.183159
